# Supplementary material for: Genes, inflammatory response, tolerance, and resistance to virus infections in migratory birds, bats, and rodents
Source: Front Immunol. 2023 Aug 29;14:1239572. doi: 10.3389/fimmu.2023.1239572 (PMC10497949; doi:10.3389/fimmu.2023.1239572)
Supplement: Supplementary file 2 [file Table_2.xlsx]

## Sheet: A macularius_VIRTUS2_descriptio
UNIQID	NAME	startpos	endpos	numreads	covbases	coverage	meandepth	meanbaseq	meanmapq	rate_hit
NC_000899.1	NC_000899.1 Fowl adenovirus D, complete genome	1	45063	1	36	0.0798882	0.000798882	23	1	1.22978e-08
NC_001491.2	NC_001491.2 Equid herpesvirus 1, complete genome	1	150224	1	29	0.0193045	0.000193045	20	1	1.22978e-08
NC_001662.1	NC_001662.1 Aleutian mink disease virus, complete genome	1	4801	1	39	0.812331	0.00812331	25.7	255	1.22978e-08
NC_002188.1	NC_002188.1 Fowlpox virus, complete genome	1	288539	1	35	0.0121301	0.000121301	20.4	255	1.22978e-08
NC_002331.1	NC_002331.1 Xestia c-nigrum granulovirus, complete genome	1	178733	1	58	0.0324506	0.000324506	25.9	255	1.22978e-08
NC_002520.1	NC_002520.1 Amsacta moorei entomopoxvirus 'L', complete genome	1	232392	1	30	0.0129092	0.000129092	18.5	255	1.22978e-08
NC_002816.1	NC_002816.1 Cydia pomonella granulovirus, complete genome	1	123500	1	46	0.037247	0.00037247	27.4	255	1.22978e-08
NC_003102.1	NC_003102.1 Spodoptera litura NPV, complete genome	1	139342	1	31	0.0222474	0.000222474	25	255	1.22978e-08
NC_004062.1	NC_004062.1 Phthorimaea operculella granulovirus, complete genome	1	119217	1	28	0.0234866	0.000234866	23.8	255	1.22978e-08
NC_004105.1	NC_004105.1 Ectromelia virus, complete genome	1	209771	1	41	0.0195451	0.000195451	23.1	3	1.22978e-08
NC_004112.1	NC_004112.1 Lactobacillus phage A2, complete genome	1	43411	1	42	0.0967497	0.000967497	18.6	255	1.22978e-08
NC_004156.2	NC_004156.2 Helicoverpa zea nudivirus 2, complete genome	1	231621	1	37	0.0159744	0.000159744	26.8	255	1.22978e-08
NC_004333.2	NC_004333.2 Burkholderia phage Bcep781, complete genome	1	48247	1	29	0.0601074	0.000601074	27.4	255	1.22978e-08
NC_004462.2	NC_004462.2 Thermus thermophilus phage IN93, complete genome	1	19604	1	41	0.209141	0.00209141	26.9	255	1.22978e-08
NC_004735.1	NC_004735.1 Rhodothermus phage RM378, complete genome	1	129908	1	36	0.0277119	0.000277119	23.2	255	1.22978e-08
NC_005045.1	NC_005045.1 Pseudomonas phage phiKMV, complete genome	1	42519	1	42	0.0987794	0.000987794	24.1	0	1.22978e-08
NC_005262.3	NC_005262.3 Burkholderia cepacia phage Bcep22, complete genome	1	63882	1	40	0.0626154	0.000626154	25.5	255	1.22978e-08
NC_005309.1	NC_005309.1 Canarypox virus, complete genome	1	359853	1	35	0.00972619	9.72619e-05	27.8	1	1.22978e-08
NC_005336.1	NC_005336.1 Orf virus, complete genome	1	139962	1	32	0.0228633	0.000228633	19.6	3	1.22978e-08
NC_005830.1	NC_005830.1 Acidianus filamentous virus 1, complete genome	1	20869	1	38	0.182088	0.00182088	21.1	255	1.22978e-08
NC_005856.1	NC_005856.1 Enterobacteria phage P1, complete genome	1	94800	1	101	0.10654	0.0010654	26.7	3	1.22978e-08
NC_006650.1	NC_006650.1 Cotesia congregata virus complete genome, segment Circle19	1	18768	1	30	0.159847	0.00159847	19.3	3	1.22978e-08
NC_006658.1	NC_006658.1 Cotesia congregata virus complete genome, segment Circle31	1	30655	1	40	0.130484	0.00130484	23.5	255	1.22978e-08
NC_006820.1	NC_006820.1 Synechococcus phage S-PM2, complete genome	1	196280	1	39	0.0198696	0.000198696	24	1	1.22978e-08
NC_006883.2	NC_006883.2 Prochlorococcus phage P-SSM2, complete genome	1	252401	1	40	0.0158478	0.000158478	22.6	255	1.22978e-08
NC_006966.1	NC_006966.1 Deerpox virus W-848-83, complete genome	1	166259	1	36	0.021653	0.00021653	22.2	1	1.22978e-08
NC_007057.1	NC_007057.1 Staphylococcus phage 96, complete genome	1	43576	1	37	0.0849091	0.000849091	20.6	255	1.22978e-08
NC_007528.1	NC_007528.1 Mycoreovirus 3 segment 9, complete sequence	1	1226	1	34	2.77325	0.0277325	25.9	255	1.22978e-08
NC_007623.1	NC_007623.1 Pseudomonas phage EL, complete genome	1	211215	1	40	0.018938	0.00018938	22.1	255	1.22978e-08
NC_008187.1	NC_008187.1 Invertebrate iridescent virus 3, complete genome	1	191100	1	39	0.0204082	0.000204082	23.6	255	1.22978e-08
NC_008300.1	NC_008300.1 Melon yellow spot virus segment S, complete sequence	1	3232	1	48	1.48515	0.0148515	22.2	255	1.22978e-08
NC_008361.1	NC_008361.1 Spodoptera frugiperda ascovirus 1a complete genome	1	156922	1	43	0.0274021	0.000274021	26.7	255	1.22978e-08
NC_008520.2	NC_008520.2 Anticarsia gemmatalis nucleopolyhedrovirus, complete genome	1	132239	1	33	0.0249548	0.000249548	18.4	3	1.22978e-08
NC_008586.1	NC_008586.1 Ecotropis obliqua NPV, complete genome	1	131204	1	31	0.0236273	0.000236273	20.3	255	1.22978e-08
NC_008603.1	NC_008603.1 Paramecium bursaria Chlorella virus FR483, complete genome	1	321240	1	30	0.00933881	9.33881e-05	25	3	1.22978e-08
NC_008695.1	NC_008695.1 Archaeal BJ1 virus complete genome	1	42271	1	33	0.0780677	0.000780677	19.1	255	1.22978e-08
NC_008724.1	NC_008724.1 Acanthocystis turfacea Chlorella virus 1, complete genome	1	288047	1	38	0.0131923	0.000131923	26	255	1.22978e-08
NC_008895.1	NC_008895.1 Glypta fumiferanae ichnovirus segment B55, complete sequence	1	2854	1	27	0.946041	0.00946041	22.1	1	1.22978e-08
NC_009603.1	NC_009603.1 Microbacterium phage Min1, complete genome	1	46365	1	34	0.0733312	0.000733312	26	255	1.22978e-08
NC_009804.1	NC_009804.1 Thermus phage P74-26, complete genome	1	83319	1	29	0.034806	0.00034806	19.4	3	1.22978e-08
NC_009823.1	NC_009823.1 Hepatitis C virus genotype 2, complete genome	1	9711	1	48	0.494285	0.00494285	19.5	255	1.22978e-08
NC_009899.1	NC_009899.1 Paramecium bursaria Chlorella virus AR158, complete genome	1	344691	1	66	0.0191476	0.000191476	27.3	0	1.22978e-08
NC_009944.1	NC_009944.1 Amasya cherry disease associated chrysovirus segment 4, complete sequence	1	2498	1	54	2.16173	0.0216173	22.5	255	1.22978e-08
NC_010537.1	NC_010537.1 Acidianus filamentous virus 9, complete genome	1	41172	1	39	0.0947246	0.000947246	22.3	255	1.22978e-08
NC_011039.1	NC_011039.1 Mycobacterium phage Predator, complete genome	1	70110	1	42	0.0599059	0.000599059	25.6	255	1.22978e-08
NC_011132.1	NC_011132.1 Sputnik virophage, complete genome	1	18343	1	37	0.201712	0.00201712	20.3	255	1.22978e-08
NC_011142.1	NC_011142.1 Iodobacteriophage phiPLPE, complete genome	1	47453	1	40	0.0842939	0.000842939	25.2	255	1.22978e-08
NC_011273.1	NC_011273.1 Mycobacterium phage Myrna, complete genome	1	164602	1	49	0.0297688	0.000297688	26.2	255	1.22978e-08
NC_011356.1	NC_011356.1 Enterobacteria phage YYZ-2008, complete prophage genome	1	54896	1	96	0.174876	0.00174876	25.5	255	1.22978e-08
NC_011644.1	NC_011644.1 Equid herpesvirus 9, complete genome	1	148371	1	27	0.0181976	0.000181976	26.2	1	1.22978e-08
NC_012959.1	NC_012959.1 Human adenovirus 54, complete genome	1	34920	1	34	0.0973654	0.000973654	26.5	255	1.22978e-08
NC_013288.1	NC_013288.1 Ostreococcus tauri virus 1 complete genome	1	191761	1	35	0.0182519	0.000182519	23.5	255	1.22978e-08
NC_014767.1	NC_014767.1 Micromonas sp. RCC1109 virus MpV1, complete genome	1	184095	1	28	0.0152095	0.000152095	27.9	255	1.22978e-08
NC_014969.1	NC_014969.1 Fowl adenovirus E, complete genome	1	44055	1	33	0.0749064	0.000749064	23.2	255	1.22978e-08
NC_015263.1	NC_015263.1 Lactococcus phage 949, complete genome	1	114768	1	42	0.0365956	0.000365956	19.9	255	1.22978e-08
NC_015398.1	NC_015398.1 Clostera anachoreta granulovirus, complete genome	1	101487	1	32	0.0315311	0.000315311	19.4	255	1.22978e-08
NC_015467.1	NC_015467.1 Groundnut ringspot and Tomato chlorotic spot virus reassortant segment S, complete genome	1	3067	1	37	1.20639	0.0120639	18.5	3	1.22978e-08
NC_015691.1	NC_015691.1 Macaca fascicularis papillomavirus type 2, complete genome	1	7632	1	39	0.511006	0.00511006	24.1	255	1.22978e-08
NC_015937.1	NC_015937.1 Thermus phage TMA, complete genome	1	151483	1	34	0.0224448	0.000224448	19.8	255	1.22978e-08
NC_016158.1	NC_016158.1 Escherichia phage HK639, complete genome	1	49576	1	35	0.0705987	0.000705987	26.3	255	1.22978e-08
NC_016959.1	NC_016959.1 Ndumu virus, complete genome	1	11688	1	32	0.273785	0.00273785	19.6	255	1.22978e-08
NC_018476.1	NC_018476.1 Simbu virus RdRp gene for RNA-dependent RNA polymerase, segment L, genomic RNA, isolate SA Ar 53	1	6895	1	31	0.449601	0.00449601	17.8	255	1.22978e-08
NC_018504.1	NC_018504.1 Apocheima cinerarium nucleopolyhedrovirus, complete genome	1	123876	1	36	0.0290613	0.000290613	25.4	255	1.22978e-08
NC_018860.1	NC_018860.1 Bacillus phage BCP78, complete genome	1	156176	1	46	0.0294539	0.000294539	26.7	1	1.22978e-08
NC_019445.1	NC_019445.1 Escherichia phage TL-2011b, complete genome	1	44784	1	88	0.196499	0.00196499	25.8	255	1.22978e-08
NC_019529.1	NC_019529.1 Vibrio phage pVp-1, complete genome	1	111506	1	32	0.028698	0.00028698	27.2	255	1.22978e-08
NC_019917.1	NC_019917.1 Burkholderia phage BcepMigl, complete genome	1	62952	1	30	0.0476554	0.000476554	26.4	1	1.22978e-08
NC_020197.1	NC_020197.1 Streptococcus phage TP-J34 complete genome	1	45606	1	40	0.0877078	0.000877078	26.8	0	1.22978e-08
NC_020234.1	NC_020234.1 Rosellinia necatrix partitivirus 2 RdRp gene for RNA-dependent RNA polymerase, complete cds	1	1985	1	33	1.66247	0.0166247	23	255	1.22978e-08
NC_020486.1	NC_020486.1 Synechococcus phage S-RIM8 A.HR1, complete genome	1	171211	1	40	0.023363	0.00023363	26.4	3	1.22978e-08
NC_020489.1	NC_020489.1 Rhodobacter phage RcapNL, complete genome	1	40489	1	27	0.0666848	0.000666848	25.3	255	1.22978e-08
NC_020837.1	NC_020837.1 Synechococcus phage S-CAM1 genomic sequence	1	198013	1	50	0.0252509	0.000252509	22.7	255	1.22978e-08
NC_020852.1	NC_020852.1 Ostreococcus lucimarinus virus OlV5 genomic sequence	1	186468	1	39	0.0209151	0.000209151	26	1	1.22978e-08
NC_020866.1	NC_020866.1 Rhodovulum phage RS1 genomic sequence	1	40231	1	46	0.11434	0.0011434	26.4	255	1.22978e-08
NC_020879.1	NC_020879.1 Aeromonas phage Aes012, complete genome	1	161978	1	45	0.0277816	0.000277816	26	255	1.22978e-08
NC_021072.1	NC_021072.1 Cyanophage Syn30 genomic sequence	1	178807	1	73	0.0408261	0.000408261	26.6	255	1.22978e-08
NC_021246.1	NC_021246.1 Mythimna separata entomopoxvirus 'L', complete genome	1	281182	1	37	0.0131587	0.000131587	20.6	255	1.22978e-08
NC_021299.1	NC_021299.1 Mycobacterium phage PegLeg, complete genome	1	80955	1	40	0.0494102	0.000494102	22.2	3	1.22978e-08
NC_021320.1	NC_021320.1 Halorubrum tailed phage 5, complete genome	1	76134	1	40	0.0525389	0.000525389	26.7	255	1.22978e-08
NC_021338.1	NC_021338.1 Mycobacterium phage Chy4, complete genome	1	46639	1	33	0.0707562	0.000707562	25.1	1	1.22978e-08
NC_021788.1	NC_021788.1 Cellulophaga phage phi4:1, complete genome	1	145865	1	29	0.0198814	0.000198814	25	3	1.22978e-08
NC_021854.1	NC_021854.1 Lactococcus phage jm3, complete genome	1	28674	1	35	0.122062	0.00122062	19.3	255	1.22978e-08
NC_021857.1	NC_021857.1 Shigella phage SfII, complete genome	1	41475	1	133	0.320675	0.00320675	25.9	3	1.22978e-08
NC_021865.1	NC_021865.1 Paenibacillus phage phiIBB_Pl23, complete genome	1	41294	1	34	0.0823364	0.000823364	19.8	3	1.22978e-08
NC_022052.1	NC_022052.1 Mycobacterium phage Whirlwind, complete genome	1	76050	1	47	0.0618014	0.000618014	26.2	1	1.22978e-08
NC_022058.1	NC_022058.1 Mycobacterium phage Adzzy, complete genome	1	52519	1	74	0.140901	0.00140901	26.6	3	1.22978e-08
NC_022090.1	NC_022090.1 Staphylococcus phage vB_SauM_Remus, complete genome	1	134643	1	30	0.0222811	0.000222811	21.6	1	1.22978e-08
NC_022233.1	NC_022233.1 Porcine cytomegalovirus strain BJ09, complete genome	1	128367	1	33	0.0257075	0.000257075	21.6	255	1.22978e-08
NC_022373.1	NC_022373.1 Felis catus papillomavirus 4 isolate MY-3, complete genome	1	7616	1	34	0.446429	0.00446429	19.3	255	1.22978e-08
NC_022761.1	NC_022761.1 Bacillus phage CampHawk, complete genome	1	146193	1	45	0.0307812	0.000307812	27.2	3	1.22978e-08
NC_023007.1	NC_023007.1 Bacillus phage vB_BanS-Tsamsa, complete genome	1	168876	1	41	0.0242782	0.000242782	25.7	255	1.22978e-08
NC_023561.1	NC_023561.1 Enterobacter phage PG7, complete genome	1	173276	1	40	0.0230846	0.000230846	27.5	0	1.22978e-08
NC_023568.1	NC_023568.1 Vibrio phage VH7D, complete genome	1	246964	1	41	0.0166016	0.000166016	17.8	3	1.22978e-08
NC_023571.1	NC_023571.1 Oenococcus phage phiS11, complete genome	1	46243	1	40	0.0864996	0.000864996	25.6	1	1.22978e-08
NC_023574.1	NC_023574.1 Lactococcus phage phiL47, complete genome	1	128546	1	32	0.0248938	0.000248938	19.7	255	1.22978e-08
NC_023582.1	NC_023582.1 Staphylococcus phage vB_SepS_SEP9, complete genome	1	92417	1	43	0.0465282	0.000465282	21.6	3	1.22978e-08
NC_023583.1	NC_023583.1 Pseudomonas phage TL complete genome	1	45696	1	62	0.135679	0.00135679	27.6	1	1.22978e-08
NC_023607.1	NC_023607.1 Mycobacterium phage 40AC, complete genome	1	53396	1	38	0.0711664	0.000711664	25.8	1	1.22978e-08
NC_023688.1	NC_023688.1 Aeromonas phage PX29, complete genome	1	222006	1	66	0.0297289	0.000297289	26.2	255	1.22978e-08
NC_023852.1	NC_023852.1 Canine papillomavirus 13 isolate Zurich/2011, complete genome	1	8228	1	30	0.364609	0.00364609	21.1	255	1.22978e-08
NC_024209.1	NC_024209.1 Mycobacterium phage Hawkeye, complete genome	1	67383	1	37	0.05491	0.0005491	21.2	255	1.22978e-08
NC_024359.1	NC_024359.1 Listeria phage LP-048, complete genome	1	133048	1	38	0.0285611	0.000285611	25.5	255	1.22978e-08
NC_024458.1	NC_024458.1 Pitaya virus X isolate P37, complete genome	1	6677	1	31	0.46428	0.0046428	19.5	255	1.22978e-08
NC_024771.1	NC_024771.1 Equid herpesvirus 3 strain AR/2007/C3A, complete genome	1	151601	1	39	0.0257254	0.000257254	19.8	255	1.22978e-08
NC_025257.1	NC_025257.1 Erinnyis ello granulovirus, complete genome	1	102759	1	39	0.0379529	0.000379529	22.7	255	1.22978e-08
NC_025412.1	NC_025412.1 Melbournevirus isolate 1, complete genome	1	369360	1	45	0.0121832	0.000121832	20.9	3	1.22978e-08
NC_025424.1	NC_025424.1 Bacillus phage Waukesha92, complete genome	1	45648	1	40	0.0876271	0.000876271	25.4	255	1.22978e-08
NC_025453.1	NC_025453.1 Enterococcus phage EFC-1, complete genome	1	40286	1	39	0.0968078	0.000968078	22.2	255	1.22978e-08
NC_025963.1	NC_025963.1 Parapoxvirus red deer/HL953 strain HL953, complete genome	1	139981	1	47	0.033576	0.00033576	26.8	255	1.22978e-08
NC_026430.1	NC_026430.1 Condylorrhiza vestigialis MNPV, complete genome	1	125767	1	32	0.0254439	0.000254439	20.1	255	1.22978e-08
NC_026594.1	NC_026594.1 Pseudomonas phage vB_PaeS_PAO1_Ab18, complete genome	1	56537	1	44	0.0778251	0.000778251	20.3	255	1.22978e-08
NC_026618.2	NC_026618.2 Mulberry vein banding virus isolate XCSY-3 segment M, complete sequence	1	4731	1	33	0.697527	0.00697527	21.3	3	1.22978e-08
NC_027132.1	NC_027132.1 Synechococcus phage ACG-2014i isolate Syn7803US120, complete genome	1	190768	1	42	0.0220163	0.000220163	24.4	255	1.22978e-08
NC_027335.2	NC_027335.2 Enterococcus phage ECP3, complete genome	1	145519	1	30	0.0206159	0.000206159	27.6	3	1.22978e-08
NC_027374.1	NC_027374.1 Bacillus phage Moonbeam, complete genome	1	161239	1	59	0.0365916	0.000365916	26.9	255	1.22978e-08
NC_027720.1	NC_027720.1 Chrysanthemum stem necrosis virus isolate PD4412741 segment M, complete sequence	1	4830	1	31	0.641822	0.00641822	20.5	255	1.22978e-08
NC_027923.1	NC_027923.1 Perigonia lusca single nucleopolyhedrovirus, complete genome	1	132831	1	45	0.0338776	0.000338776	24.5	255	1.22978e-08
NC_028092.1	NC_028092.1 Ostreococcus mediterraneus virus 1 isolate OmV1, complete genome	1	193301	1	49	0.0253491	0.000253491	23.5	1	1.22978e-08
NC_028095.1	NC_028095.1 Torulaspora delbrueckii dsRNA Mbarr-1 killer virus strain EX1180 Kbarr-1 killer toxin gene, complete cds	1	1705	1	44	2.58065	0.0258065	18.4	255	1.22978e-08
NC_028250.1	NC_028250.1 Rosellinia necatrix partitivirus 6 CP gene for capsid protein, complete cds, strain: W113	1	2499	1	46	1.84074	0.0184074	19	255	1.22978e-08
NC_028267.1	NC_028267.1 Trichechus manatus papillomavirus 4 strain TmPV-4, complete genome	1	7771	1	39	0.501866	0.00501866	18.4	3	1.22978e-08
NC_028268.1	NC_028268.1 Aeropyrum pernix spindle-shaped virus 1 complete genome	1	38049	1	38	0.0998712	0.000998712	25.1	255	1.22978e-08
NC_028490.1	NC_028490.1 Red clover powdery mildew-associated totivirus 9 gene for polyprotein, complete cds, isolate: RPaTV9_85-21	1	5997	1	38	0.63365	0.0063365	21.9	255	1.22978e-08
NC_028807.1	NC_028807.1 Streptomyces phage SF1, complete genome	1	43150	1	35	0.0811124	0.000811124	27.2	3	1.22978e-08
NC_028811.1	NC_028811.1 BtMr-AlphaCoV/SAX2011, complete genome	1	27935	1	34	0.121711	0.00121711	20.4	255	1.22978e-08
NC_028822.1	NC_028822.1 Escherichia phage P483, complete genome	1	40829	1	33	0.0808249	0.000808249	27.9	3	1.22978e-08
NC_028887.1	NC_028887.1 Bacillus phage AvesoBmore, complete genome	1	167431	1	43	0.0256822	0.000256822	18.8	255	1.22978e-08
NC_028890.1	NC_028890.1 Bacillus phage TsarBomba, complete genome	1	162486	1	28	0.0172323	0.000172323	24.5	1	1.22978e-08
NC_028904.1	NC_028904.1 Streptomyces phage Amela, complete genome	1	49452	1	34	0.0687535	0.000687535	21.9	3	1.22978e-08
NC_029006.1	NC_029006.1 Clostridium phage phiCT19406C, complete genome	1	35703	1	39	0.109235	0.00109235	18.6	255	1.22978e-08
NC_029046.1	NC_029046.1 Sinorhizobium phage phiLM21, complete genome	1	50827	1	75	0.147559	0.00147559	24	255	1.22978e-08
NC_029054.2	NC_029054.2 Potiskum virus strain IBAN 10069 polyprotein gene, complete cds	1	10173	1	31	0.304728	0.00304728	20.9	255	1.22978e-08
NC_030148.1	NC_030148.1 Marbled eel polyomavirus isolate AMV-1, complete genome	1	14334	1	28	0.19534	0.0019534	26.2	255	1.22978e-08
NC_030240.1	NC_030240.1 Catopsilia pomona nucleopolyhedrovirus isolate 416, complete genome	1	128058	1	33	0.0257696	0.000257696	19.9	255	1.22978e-08
NC_030394.2	NC_030394.2 Short-finned eel ranavirus isolate ANGA14001, complete genome	1	126965	1	39	0.0307171	0.000307171	22	0	1.22978e-08
NC_030884.1	NC_030884.1 Sulfolobus islandicus rudivirus 3 isolate SIRV3, complete genome	1	32995	1	34	0.103046	0.00103046	18	255	1.22978e-08
NC_030889.1	NC_030889.1 Arabidopsis halleri partitivirus 1 gene for RNA dependent RNA polymerase, complete cds	1	1959	1	40	2.04186	0.0204186	19.7	255	1.22978e-08
NC_030927.1	NC_030927.1 Gordonia phage Splinter, complete genome	1	45858	1	30	0.0654193	0.000654193	22.5	0	1.22978e-08
NC_030950.1	NC_030950.1 Clostridium phage phiCT19406A, complete genome	1	47020	1	39	0.0829434	0.000829434	23.1	1	1.22978e-08
NC_031012.1	NC_031012.1 Bacillus phage Kida, complete genome	1	162151	1	36	0.0222015	0.000222015	19.8	0	1.22978e-08
NC_031020.1	NC_031020.1 Morganella phage vB_MmoM_MP1, complete genome	1	163201	1	68	0.0416664	0.000416664	24.6	255	1.22978e-08
NC_031029.1	NC_031029.1 Gordonia phage Cucurbita, complete genome	1	93686	1	34	0.0362914	0.000362914	25.4	3	1.22978e-08
NC_031054.1	NC_031054.1 Bacillus phage DirtyBetty, complete genome	1	162415	1	35	0.0215497	0.000215497	27	255	1.22978e-08
NC_031113.1	NC_031113.1 Escherichia phage Gluttony, complete genome	1	44513	1	29	0.0651495	0.000651495	19.8	1	1.22978e-08
NC_031255.2	NC_031255.2 Gordonia phage Schnabeltier, complete genome	1	46895	1	28	0.0597079	0.000597079	25.7	255	1.22978e-08
NC_031465.1	NC_031465.1 Golden Marseillevirus, complete genome	1	360610	1	34	0.00942847	9.42847e-05	22.5	3	1.22978e-08
NC_031503.1	NC_031503.1 Pigeon adenovirus 2 isolate YPDS-Y-V1.A19.11-2013, complete genome	1	41981	1	43	0.102427	0.00102427	25.3	255	1.22978e-08
NC_031686.1	NC_031686.1 Corey virus strain UWV, complete genome	1	9220	1	41	0.444685	0.00444685	19.4	255	1.22978e-08
NC_032108.1	NC_032108.1 Cedratvirus A11 genome assembly, complete genome: monopartite	1	589068	1	47	0.00797871	7.97871e-05	27.8	1	1.22978e-08
NC_032439.1	NC_032439.1 Beihai astro-like virus strain BHWZXX13371 putative protease, RNA-dependent RNA polymerase, and putative capsid genes, complete cds	1	6856	1	37	0.539673	0.00539673	16.6	255	1.22978e-08
NC_033176.1	NC_033176.1 Cynomolgus cytomegalovirus isolate 31908, complete genome	1	224064	1	35	0.0156205	0.000156205	19.6	3	1.22978e-08
NC_033423.1	NC_033423.1 Lymphocystis disease virus Sa isolate SA9, complete genome	1	208501	1	28	0.0134292	0.000134292	23.5	255	1.22978e-08
NC_034544.1	NC_034544.1 Iriri virus nucleoprotein, phosphoprotein, matrix, hypothetical proteins, glycoprotein, hypothetical proteins, and polymerase genes, complete cds	1	13070	1	38	0.290742	0.00290742	22.7	255	1.22978e-08
NC_035460.1	NC_035460.1 Eptesipox virus strain Washington, complete genome	1	176688	1	38	0.0215068	0.000215068	21.6	255	1.22978e-08
NC_035462.1	NC_035462.1 Ocimum basilicum RNA virus 1 isolate DV1 RNA-dependent RNA polymerase and movement protein genes, complete cds	1	6930	1	26	0.37518	0.0037518	19.9	255	1.22978e-08
NC_036608.1	NC_036608.1 Calla lily chlorotic spot virus strain CCSV-Cel segment M, complete sequence	1	4734	1	38	0.802704	0.00802704	18.4	255	1.22978e-08
NC_037069.1	NC_037069.1 Leptonychotes weddellii papillomavirus 3 isolate 17181, complete genome	1	7677	1	31	0.403804	0.00403804	27.9	3	1.22978e-08
NC_038333.1	NC_038333.1 Bottlenose dolphin adenovirus 1 strain Tt11018, partial genome	1	29474	1	39	0.13232	0.0013232	27.1	255	1.22978e-08
NC_038369.1	NC_038369.1 Spodoptera littoralis NPV isolate AN1956, complete genome	1	137998	1	33	0.0239134	0.000239134	17	3	1.22978e-08
NC_038507.1	NC_038507.1 Bohle iridovirus isolate BIV-ME 93/35, complete genome	1	103531	1	42	0.0405676	0.000405676	20.1	255	1.22978e-08
NC_039016.1	NC_039016.1 Avian paramyxovirus UPO216 isolate APMV-15/WB/Kr/UPO216/2014, complete genome	1	15180	1	30	0.197628	0.00197628	15.2	255	1.22978e-08
NC_039199.1	NC_039199.1 Human metapneumovirus isolate 00-1, complete genome	1	13350	1	46	0.344569	0.00344569	19.6	255	1.22978e-08
NC_040308.1	NC_040308.1 Sewage-associated circular DNA virus-13 isolate SaCV-13_NZ-BS4044-2012, complete genome	1	3533	1	38	1.07557	0.0107557	23	255	1.22978e-08
NC_040361.1	NC_040361.1 Planarian secretory cell nidovirus isolate UIUC, complete genome	1	41178	1	28	0.0679975	0.000679975	21.5	255	1.22978e-08
NC_040681.1	NC_040681.1 Bufonid herpesvirus 1 strain FO1_2015, complete genome	1	158250	1	42	0.0265403	0.000265403	23.9	255	1.22978e-08
NC_041869.1	NC_041869.1 Escherichia phage APCEc02, complete genome	1	135400	1	30	0.0221566	0.000221566	19.3	3	1.22978e-08
NC_041911.1	NC_041911.1 Ralstonia phage RP12 DNA, complete genome	1	279845	1	32	0.0114349	0.000114349	20	255	1.22978e-08
NC_041924.1	NC_041924.1 Acinetobacter phage WCHABP12, complete genome	1	45415	1	31	0.0682594	0.000682594	18.7	255	1.22978e-08
NC_041946.1	NC_041946.1 Arthrobacter phage Wayne, complete genome	1	44371	1	33	0.0743729	0.000743729	27.1	0	1.22978e-08
NC_041971.1	NC_041971.1 Mycobacterium phage Rey, complete genome	1	83724	1	32	0.0382208	0.000382208	25.2	255	1.22978e-08
NC_042056.1	NC_042056.1 Erwinia phage vB_EamM_Machina, complete genome	1	241654	1	74	0.0306223	0.000306223	27.3	1	1.22978e-08
NC_042060.1	NC_042060.1 Pseudomonas phage PA7, partial genome	1	266743	1	72	0.0269923	0.000269923	25.7	1	1.22978e-08
NC_042099.1	NC_042099.1 Microbacterium phage Dismas, complete genome	1	41593	1	40	0.09617	0.0009617	19.2	255	1.22978e-08
NC_042105.1	NC_042105.1 Streptomyces phage BillNye, complete genome	1	127084	1	41	0.0322621	0.000322621	19.8	255	1.22978e-08
NC_042313.1	NC_042313.1 Mycobacterium virus JoeDirt, complete genome	1	74914	1	30	0.0400459	0.000400459	22.3	255	1.22978e-08
NC_043027.1	NC_043027.1 Bacillus virus PBS1, complete genome	1	252197	1	41	0.0162571	0.000162571	23.3	3	1.22978e-08
NC_043318.1	NC_043318.1 Diolcogaster facetosa bracovirus segment 13, complete sequence	1	31710	1	28	0.0883002	0.000883002	20.4	255	1.22978e-08
NC_043326.1	NC_043326.1 Diolcogaster facetosa bracovirus segment 5, complete sequence	1	41240	1	46	0.111542	0.00111542	20.1	1	1.22978e-08
NC_043382.1	NC_043382.1 Snyder-Theilen feline sarcoma virus genomic sequence	1	4901	1	63	1.28545	0.0128545	24.9	255	1.22978e-08
NC_043520.1	NC_043520.1 Lonomia obliqua multiple nucleopolyhedrovirus isolate SP/2000, complete genome	1	120023	1	37	0.0308274	0.000308274	20.8	255	1.22978e-08
NC_043529.1	NC_043529.1 Oxyplax ochracea nucleopolyhedrovirus isolate 435, complete genome	1	113971	1	33	0.0289547	0.000289547	17.5	255	1.22978e-08
NC_043691.1	NC_043691.1 Patois virus isolate 63A49 segment M glycoprotein precursor, gene, complete cds	1	4637	1	38	0.819495	0.00819495	18.1	255	1.22978e-08
NC_047733.1	NC_047733.1 Synechococcus phage S-RIM8 isolate RW_22_0300, complete genome	1	171216	1	30	0.0175217	0.000175217	20.4	3	1.22978e-08
NC_047736.1	NC_047736.1 Bacillus phage B5S, complete genome	1	162598	1	31	0.0190654	0.000190654	22.6	0	1.22978e-08
NC_047813.1	NC_047813.1 Staphylococcus phage Andhra, complete genome	1	18546	1	33	0.177936	0.00177936	27.6	1	1.22978e-08
NC_047845.1	NC_047845.1 Agrobacterium phage Atu_ph02, complete genome	1	45423	1	50	0.110076	0.00110076	27.5	3	1.22978e-08
NC_047865.1	NC_047865.1 Aeromonas phage CF7, complete genome	1	42439	1	28	0.065977	0.00065977	18.1	255	1.22978e-08
NC_047885.1	NC_047885.1 Bacteriophage T5-like chee24, complete genome	1	120622	1	38	0.0315034	0.000315034	26	3	1.22978e-08
NC_047976.1	NC_047976.1 Microbacterium phage Paschalis, complete genome	1	52935	1	51	0.0963446	0.000963446	27.7	1	1.22978e-08
NC_047990.1	NC_047990.1 Gordonia phage Suzy, complete genome	1	67118	1	38	0.0566167	0.000566167	20.6	255	1.22978e-08
NC_047995.1	NC_047995.1 Erwinia phage vB_EamM_Alexandra, complete genome	1	266532	1	44	0.0165083	0.000165083	27.4	3	1.22978e-08
NC_048053.1	NC_048053.1 Dickeya phage vB_DsoM_JA29, complete genome	1	253323	1	35	0.0138164	0.000138164	26.3	1	1.22978e-08
NC_048098.1	NC_048098.1 Arthrobacter phage Andrew, complete genome	1	38802	1	35	0.0902015	0.000902015	26.6	255	1.22978e-08
NC_048104.1	NC_048104.1 Lactobacillus phage ViSo-2018a, partial genome	1	72362	1	35	0.0483679	0.000483679	25.5	255	1.22978e-08
NC_048117.1	NC_048117.1 Pectobacterium phage Khlen, complete genome	1	44013	1	33	0.0749778	0.000749778	21.2	255	1.22978e-08
NC_048152.1	NC_048152.1 Arthrobacter phage Sonali, complete genome	1	61073	1	30	0.0491215	0.000491215	19.6	255	1.22978e-08
NC_048153.1	NC_048153.1 Streptomyces phage Austintatious, complete genome	1	36213	1	34	0.0938889	0.000938889	21.4	255	1.22978e-08
NC_048676.1	NC_048676.1 Pseudomonas phage SL1, complete genome	1	65847	1	30	0.0455602	0.000455602	17.4	255	1.22978e-08
NC_048694.1	NC_048694.1 Klebsiella phage vB_Kpn_F48, complete genome	1	170764	1	63	0.036893	0.00036893	25.7	3	1.22978e-08
NC_048696.1	NC_048696.1 Mycobacterium phage Cuke, complete genome	1	68869	1	42	0.0609853	0.000609853	25.9	255	1.22978e-08
NC_048786.1	NC_048786.1 Salmonella phage SE11, complete genome	1	107763	1	42	0.0389744	0.000389744	25.3	255	1.22978e-08
NC_048797.1	NC_048797.1 Bacillus phage vB_BmeM-Goe8, complete genome	1	161583	1	36	0.0222796	0.000222796	23.4	255	1.22978e-08
NC_048802.1	NC_048802.1 Stenotrophomonas phage Moby, complete genome	1	159365	1	70	0.0439243	0.000439243	27.3	1	1.22978e-08
NC_048860.1	NC_048860.1 Microbacterium phage Arete, complete genome	1	53692	1	29	0.0540118	0.000540118	23.7	3	1.22978e-08
NC_049432.1	NC_049432.1 Ralstonia phage RsoM1USA, complete genome	1	39309	1	52	0.132285	0.00132285	22.8	3	1.22978e-08
NC_049441.1	NC_049441.1 Acinetobacter phage KARL-1, complete genome	1	166560	1	32	0.0192123	0.000192123	27	255	1.22978e-08
NC_049448.1	NC_049448.1 Klebsiella phage ST437-OXA245phi4.1, complete genome	1	39642	1	36	0.0908128	0.000908128	25.8	0	1.22978e-08
NC_049456.2	NC_049456.2 Pseudomonas phage Zuri, complete genome	1	75873	1	50	0.0658996	0.000658996	24.3	255	1.22978e-08
NC_049467.1	NC_049467.1 Klebsiella phage KpCHEMY26, complete genome	1	70678	1	37	0.0523501	0.000523501	26.2	255	1.22978e-08
NC_049851.1	NC_049851.1 Burkholderia phage BcepSauron, complete genome	1	262653	1	40	0.0152292	0.000152292	27.1	3	1.22978e-08
NC_049854.1	NC_049854.1 Lactococcus phage AM1, complete genome	1	125658	1	37	0.029445	0.00029445	23.1	255	1.22978e-08
NC_049950.1	NC_049950.1 Escherichia virus Lambda_2H10 genome assembly, chromosome: 1	1	46288	1	44	0.095057	0.00095057	25.6	255	1.22978e-08
NC_049952.1	NC_049952.1 Escherichia virus Lambda_2B8 genome assembly, chromosome: 1	1	48763	1	32	0.0656235	0.000656235	27.1	255	1.22978e-08
NC_050153.1	NC_050153.1 Escherichia phage vB_EcoM-Ro157c2YLVW, complete genome	1	80732	1	52	0.0644106	0.000644106	26.7	255	1.22978e-08
NC_051581.1	NC_051581.1 Mycobacterium phage BirdsNest, complete genome	1	70668	1	28	0.0396219	0.000396219	22.6	255	1.22978e-08
NC_051594.1	NC_051594.1 Mycobacterium phage Leston, complete genome	1	61808	1	40	0.0647165	0.000647165	19.8	1	1.22978e-08
NC_051596.1	NC_051596.1 Mycobacterium phage Rando14, complete genome	1	59925	1	49	0.0817689	0.000817689	22.6	255	1.22978e-08
NC_051640.1	NC_051640.1 Mycobacterium phage ByChance, complete genome	1	53123	1	41	0.0771794	0.000771794	27.2	1	1.22978e-08
NC_051641.1	NC_051641.1 Mycobacterium phage Byougenkin, complete genome	1	54685	1	36	0.0658316	0.000658316	26.4	0	1.22978e-08
NC_051719.1	NC_051719.1 Mycobacterium phage WillSterrel, complete genome	1	58608	1	40	0.0682501	0.000682501	24.6	255	1.22978e-08
NC_052429.1	NC_052429.1 Mycobacterium phage Dulcie, complete genome	1	53970	1	36	0.0667037	0.000667037	20.1	255	1.22978e-08
NC_052650.1	NC_052650.1 Halobacterium phage phiH variant phiH1, complete genome	1	58072	1	37	0.063714	0.00063714	20	255	1.22978e-08
NC_052661.1	NC_052661.1 Escherichia phage ukendt, complete genome	1	150947	1	34	0.0225245	0.000225245	18.5	255	1.22978e-08
NC_052977.1	NC_052977.1 Bacteriophage Phobos, complete genome	1	56734	1	34	0.0599288	0.000599288	22.2	3	1.22978e-08
NC_052986.1	NC_052986.1 Aeromonas phage BUCT551, complete genome	1	61382	1	57	0.0928611	0.000928611	26.5	1	1.22978e-08
NC_053240.1	NC_053240.1 Gordonia phage Tangerine, complete genome	1	57306	1	37	0.0645657	0.000645657	27.2	255	1.22978e-08
NC_053243.1	NC_053243.1 Gordonia phage EMoore, complete genome	1	58844	1	32	0.0543811	0.000543811	24.7	255	1.22978e-08
NC_054460.1	NC_054460.1 Xanthomonas phage KPhi1, complete genome	1	46077	1	39	0.0846409	0.000846409	22.3	3	1.22978e-08
NC_054637.1	NC_054637.1 Escherichia coli Phage vB_EcoS-Sa179lw, complete genome	1	46833	1	30	0.0640574	0.000640574	26.2	255	1.22978e-08
NC_054650.1	NC_054650.1 Shigella phage DS8, complete genome	1	44605	1	31	0.0694989	0.000694989	22.4	1	1.22978e-08
NC_054714.1	NC_054714.1 Mycobacterium phage Phabba, complete genome	1	164254	1	38	0.0231349	0.000231349	21.8	3	1.22978e-08
NC_054715.1	NC_054715.1 Mycobacterium phage Bigswole, complete genome	1	156514	1	26	0.0166119	0.000166119	27.4	255	1.22978e-08
NC_054723.1	NC_054723.1 Gordonia phage Pupper, complete genome	1	150830	1	44	0.0291719	0.000291719	26.4	255	1.22978e-08
NC_054725.1	NC_054725.1 Gordonia phage Skog, complete genome	1	152435	1	42	0.0275527	0.000275527	21.1	255	1.22978e-08
NC_054771.1	NC_054771.1 Mycobacterium phage MA5, complete genome	1	47895	1	39	0.0814281	0.000814281	23.5	255	1.22978e-08
NC_054772.1	NC_054772.1 Mycobacterium phage BabyRay, complete genome	1	50657	1	35	0.0690921	0.000690921	17.4	1	1.22978e-08
NC_054787.1	NC_054787.1 Mycobacterium phage Steamy, complete genome	1	53420	1	26	0.0486709	0.000486709	17.8	255	1.22978e-08
NC_054792.1	NC_054792.1 Mycobacterium phage PP DNA, complete genome	1	51509	1	34	0.0660079	0.000660079	26.4	255	1.22978e-08
NC_054812.1	NC_054812.1 Mycobacterium phage JoshKayV, complete genome	1	53366	1	32	0.0599633	0.000599633	25.8	255	1.22978e-08
NC_054900.1	NC_054900.1 Citrobacter phage PhiZZ6, complete genome	1	165795	1	39	0.023523	0.00023523	22.6	3	1.22978e-08
NC_054965.1	NC_054965.1 Klebsiella phage LASTA, complete genome	1	62420	1	49	0.0785005	0.000785005	26.9	255	1.22978e-08
NC_055165.1	NC_055165.1 Shrimp hemocyte iridescent virus isolate 20141215, complete genome	1	165809	1	42	0.0253303	0.000253303	20.5	255	1.22978e-08
NC_055323.1	NC_055323.1 Itaporanga virus isolate original segment M, complete sequence	1	4206	1	35	0.832145	0.00832145	26.5	255	1.22978e-08
NC_055336.1	NC_055336.1 Precarious point virus segment S, complete sequence	1	1785	1	34	1.90476	0.0190476	18.9	255	1.22978e-08
NC_055412.1	NC_055412.1 Tomato yellow ring virus strain TYRV-t non-structural protein (NS) and nucleocapsid protein (N) genes, complete cds	1	3061	1	38	1.24142	0.0124142	21.6	255	1.22978e-08
NC_055603.1	NC_055603.1 Lymphocystis disease virus 4 isolate LCDV-WC, complete genome	1	211086	1	39	0.0184759	0.000184759	23.5	255	1.22978e-08
NC_055638.1	NC_055638.1 Bern perch virus strain BEPV CH17 segment M, complete sequence	1	3804	1	38	0.998948	0.00998948	18.8	3	1.22978e-08
NC_055649.1	NC_055649.1 Actinidia emaravirus 2 isolate YD segment RNA4 movement protein gene, complete cds	1	1514	1	33	2.17966	0.0217966	24	255	1.22978e-08
NC_055714.1	NC_055714.1 Mycobacterium phage Fortunato, complete genome	1	70679	1	35	0.0495197	0.000495197	26.6	1	1.22978e-08
NC_055726.1	NC_055726.1 Cronobacter phage Pet-CM3-4 genome assembly, chromosome: I	1	171975	1	34	0.0197703	0.000197703	21.8	3	1.22978e-08
NC_055733.1	NC_055733.1 Aeromonas phage Ah1, complete genome	1	221116	1	30	0.0135675	0.000135675	23.9	255	1.22978e-08
NC_055747.1	NC_055747.1 Aeromonas phage 60AhydR15PP, complete genome	1	165795	1	64	0.0386019	0.000386019	27	255	1.22978e-08
NC_055788.1	NC_055788.1 Gordonia phage NosilaM, complete genome	1	67662	1	32	0.0472939	0.000472939	22.2	255	1.22978e-08
NC_055792.1	NC_055792.1 Gordonia phage Walrus, complete genome	1	52024	1	29	0.0557435	0.000557435	25.3	255	1.22978e-08
NC_055832.1	NC_055832.1 Bacteroides phage DAC15, complete genome	1	99494	1	41	0.0412085	0.000412085	21.7	0	1.22978e-08
NC_055847.1	NC_055847.1 Vibrio phage River4, complete genome	1	128425	1	41	0.0319252	0.000319252	25.7	255	1.22978e-08
NC_055849.1	NC_055849.1 Vibrio phage Cody, complete genome	1	126683	1	40	0.0315749	0.000315749	23.8	1	1.22978e-08
NC_055874.1	NC_055874.1 CrAssphage cr3_1, complete genome	1	91101	1	31	0.0340282	0.000340282	22.2	255	1.22978e-08
NC_055880.1	NC_055880.1 CrAssphage cr111_1, complete genome	1	102434	1	30	0.0292872	0.000292872	21.2	255	1.22978e-08
NC_055885.1	NC_055885.1 CrAssphage cr128_1, complete genome	1	95150	1	36	0.037835	0.00037835	21.4	255	1.22978e-08
NC_061446.1	NC_061446.1 Erwinia phage pEa_SNUABM_30, complete genome	1	259771	1	34	0.0130885	0.000130885	23.7	255	1.22978e-08
NC_061449.1	NC_061449.1 Erwinia phage pEa_SNUABM_17, complete genome	1	263916	1	29	0.0109883	0.000109883	25	1	1.22978e-08
NC_061450.1	NC_061450.1 Erwinia phage pEa_SNUABM_5, complete genome	1	267169	1	41	0.0153461	0.000153461	22.3	255	1.22978e-08
NC_062746.1	NC_062746.1 Polaribacter phage Freya_1, complete genome	1	43978	1	36	0.0818591	0.000818591	21.4	3	1.22978e-08
NC_062755.1	NC_062755.1 Haloarcula virus HJTV-2, complete genome	1	76821	1	47	0.0611812	0.000611812	27	1	1.22978e-08
NC_062759.1	NC_062759.1 Halorubrum virus HRTV-25, complete genome	1	61934	1	32	0.0516679	0.000516679	21.8	255	1.22978e-08
NC_062767.1	NC_062767.1 Uncultured phage cr149_1, complete genome	1	100971	1	34	0.033673	0.00033673	20.6	255	1.22978e-08
NC_067218.1	NC_067218.1 Uncultured phage cr23_1, complete genome	1	98182	1	29	0.029537	0.00029537	24.4	255	1.22978e-08
NC_069741.1	NC_069741.1 Pseudomonas phage Kaya, complete genome	1	43067	1	68	0.157894	0.00157894	26.1	0	1.22978e-08
NC_069743.1	NC_069743.1 Pseudomonas phage Guyu, complete genome	1	43141	1	51	0.118217	0.00118217	26.2	0	1.22978e-08
NC_070664.1	NC_070664.1 Streptococcus phage CHPC1062, complete genome	1	40037	1	44	0.109898	0.00109898	20.8	255	1.22978e-08
NC_070704.1	NC_070704.1 Streptococcus phage P7602, complete genome	1	37202	1	29	0.0779528	0.000779528	27	0	1.22978e-08
NC_070837.1	NC_070837.1 Arthrobacter phage Faja, complete genome	1	52490	1	40	0.076205	0.00076205	26.6	255	1.22978e-08
NC_070839.1	NC_070839.1 Synechococcus phage S-SZBM1, complete genome	1	177834	1	73	0.0410495	0.000410495	27.5	3	1.22978e-08
NC_070875.1	NC_070875.1 Serratia phage Scapp, complete genome	1	42969	1	37	0.0861086	0.000861086	26.5	255	1.22978e-08
NC_070883.1	NC_070883.1 Rhizobium phage RHph_Y68, complete genome	1	152762	1	39	0.0255299	0.000255299	22.5	255	1.22978e-08
NC_070886.1	NC_070886.1 Rhizobium phage P9VFCI, complete genome	1	156502	1	42	0.0268367	0.000268367	19	3	1.22978e-08
NC_070937.1	NC_070937.1 Cronobacter phage LPCS28, complete genome	1	182723	1	64	0.0350257	0.000350257	21.4	3	1.22978e-08
NC_070947.1	NC_070947.1 Arthrobacter phage KeaneyLin, complete genome	1	57847	1	34	0.0587757	0.000587757	18.2	1	1.22978e-08
NC_070954.1	NC_070954.1 Burkholderia phage Magia, complete genome	1	44942	1	41	0.0912287	0.000912287	27.5	3	1.22978e-08
NC_070964.1	NC_070964.1 Synechococcus phage S-H38, complete genome	1	180224	1	49	0.0271884	0.000271884	21	255	1.22978e-08
NC_070967.1	NC_070967.1 Rhizobium phage RHph_Y65, complete genome	1	206821	1	76	0.0367468	0.000367468	27.2	255	1.22978e-08
NC_070981.1	NC_070981.1 Escherichia phage EK010 DNA, complete sequence	1	78078	1	35	0.044827	0.00044827	24	255	1.22978e-08
NC_071030.1	NC_071030.1 Arthrobacter phage Kaylissa, complete genome	1	44124	1	40	0.0906536	0.000906536	24.4	3	1.22978e-08
NC_071039.1	NC_071039.1 Pseudomonas phage vB_PaeM_PA5oct, complete genome	1	286783	1	72	0.0251061	0.000251061	26.4	255	1.22978e-08
NC_071041.1	NC_071041.1 Bacillus phage Kirov, complete genome	1	165667	1	35	0.0211267	0.000211267	19.7	255	1.22978e-08
NC_071049.1	NC_071049.1 Bacillus phage vB_BcoS-136, complete genome	1	160590	1	42	0.0261536	0.000261536	28.4	255	1.22978e-08
AC_000007.1	AC_000007.1 Human adenovirus 2, complete genome	1	35937	2	41	0.114089	0.00225394	25.3	3	2.45957e-08
AC_000013.1	AC_000013.1 Fowl adenovirus D, complete genome	1	45063	2	37	0.0821073	0.00164215	23.1	3	2.45957e-08
NC_001350.1	NC_001350.1 Saimiriine herpesvirus 2 complete genome	1	112930	2	72	0.0637563	0.000788099	25	255	2.45957e-08
NC_001550.1	NC_001550.1 Mason-Pfizer monkey virus, complete genome	1	8557	2	51	0.596003	0.0115695	23.5	255	2.45957e-08
NC_001806.2	NC_001806.2 Human herpesvirus 1 strain 17, complete genome	1	152222	2	85	0.0558395	0.000558395	22.7	255	2.45957e-08
NC_001962.1	NC_001962.1 Bombyx mori NPV, complete genome	1	128413	2	77	0.0599628	0.000599628	22.8	255	2.45957e-08
NC_003084.1	NC_003084.1 Culex nigripalpus NPV, complete genome	1	108252	2	73	0.0674352	0.000674352	22.4	255	2.45957e-08
NC_003529.1	NC_003529.1 Mamestra configurata NPV-A, complete genome	1	155060	2	75	0.0483684	0.000483684	25	129	2.45957e-08
NC_004313.1	NC_004313.1 Salmonella phage ST64B, complete genome	1	40149	2	41	0.10212	0.00176841	25.8	1	2.45957e-08
NC_005264.1	NC_005264.1 Psittacid herpesvirus 1, complete genome	1	163025	2	42	0.0257629	0.000509124	27.5	255	2.45957e-08
NC_005344.1	NC_005344.1 Enterobacteria phage Sf6, complete genome	1	39043	2	114	0.291986	0.00291986	26.3	3	2.45957e-08
NC_005950.1	NC_005950.1 Snow goose hepatitis B virus, complete genome	1	3024	2	87	2.87698	0.0575397	24.2	255	2.45957e-08
NC_008348.1	NC_008348.1 Leucania separata nuclear polyhedrosis virus strain AH1, complete genome	1	168041	2	41	0.0243988	0.00038681	26.3	128	2.45957e-08
NC_009503.1	NC_009503.1 Spodoptera litura granulovirus, complete genome	1	124121	2	68	0.0547852	0.000547852	20.7	255	2.45957e-08
NC_010671.1	NC_010671.1 Musca domestica salivary gland hypertrophy virus, complete genome	1	124279	2	90	0.0724177	0.000724177	25	255	2.45957e-08
NC_010739.1	NC_010739.1 Ursus maritimus papillomavirus 1, complete genome	1	7582	2	86	1.13427	0.0113427	23.5	255	2.45957e-08
NC_010811.2	NC_010811.2 Ralstonia phage RSL1, complete genome	1	231255	2	42	0.0181618	0.000363235	23.2	255	2.45957e-08
NC_012136.1	NC_012136.1 Gayfeather mild mottle virus RNA 3, complete sequence	1	2214	2	27	1.21951	0.0243902	26.9	255	2.45957e-08
NC_012743.2	NC_012743.2 Burkholderia phage BcepIL02, complete genome	1	62715	2	39	0.0621861	0.00124372	27.1	255	2.45957e-08
NC_015326.1	NC_015326.1 Lausannevirus, complete genome	1	346754	2	85	0.0245131	0.000245131	20.4	255	2.45957e-08
NC_015780.1	NC_015780.1 Wiseana iridescent virus, complete genome	1	205791	2	80	0.0388744	0.000388744	20.4	255	2.45957e-08
NC_015960.1	NC_015960.1 Yoka poxvirus, complete genome	1	175699	2	40	0.0227662	0.000421175	24.5	129	2.45957e-08
NC_016154.1	NC_016154.1 Cynomolgus macaque cytomegalovirus strain Ottawa, complete genome	1	218041	2	46	0.0210969	0.000394421	21.4	255	2.45957e-08
NC_016654.1	NC_016654.1 Rhodococcus phage REQ3, complete genome	1	39474	2	46	0.116532	0.00233065	25.9	255	2.45957e-08
NC_016924.1	NC_016924.1 Cotia virus SPAn232, complete genome	1	185139	2	71	0.0383496	0.000383496	23.9	129	2.45957e-08
NC_017826.1	NC_017826.1 Equid herpesvirus 8, complete genome	1	149332	2	40	0.026786	0.000535719	26.9	255	2.45957e-08
NC_019408.1	NC_019408.1 Caulobacter phage CcrRogue, complete genome	1	223720	2	34	0.0151976	0.000299481	24.6	255	2.45957e-08
NC_019490.1	NC_019490.1 Riemerella phage RAP44, complete genome	1	49329	2	75	0.15204	0.00194612	18.8	255	2.45957e-08
NC_019515.1	NC_019515.1 Bacillus phage BCD7, complete genome	1	93839	2	41	0.0436919	0.000873837	27.4	3	2.45957e-08
NC_019522.1	NC_019522.1 Pectobacterium phage ZF40, complete genome	1	48454	2	66	0.136212	0.00239402	26.4	255	2.45957e-08
NC_019708.1	NC_019708.1 Enterobacteria phage mEp235, complete genome	1	37595	2	233	0.619763	0.00619763	26.1	2	2.45957e-08
NC_021901.1	NC_021901.1 Invertebrate iridovirus 22 complete genome	1	197693	2	66	0.0333851	0.000333851	21.9	3	2.45957e-08
NC_021923.1	NC_021923.1 Hemileuca sp. nucleopolyhedrovirus, complete genome	1	140633	2	64	0.0455085	0.000455085	27.2	255	2.45957e-08
NC_022612.1	NC_022612.1 Turkey adenovirus 4 isolate TNI1, complete genome	1	42940	2	38	0.0884956	0.00176991	27.6	255	2.45957e-08
NC_023175.1	NC_023175.1 Zucchini tigre mosaic virus isolate Re01-25, complete genome	1	10346	2	48	0.463947	0.00792577	23	255	2.45957e-08
NC_024446.1	NC_024446.1 Penguinpox virus isolate PSan92, complete genome	1	306862	2	81	0.0263962	0.000263962	23.9	255	2.45957e-08
NC_024692.1	NC_024692.1 Penaeus monodon nudivirus, complete genome	1	119638	2	70	0.0585098	0.000643608	24.9	128	2.45957e-08
NC_024696.1	NC_024696.1 Elephant endotheliotropic herpesvirus 5 strain Vijay, complete genome	1	180800	2	44	0.0243363	0.000486726	27.2	255	2.45957e-08
NC_025404.1	NC_025404.1 Achimota virus 2, complete genome	1	15504	2	42	0.270898	0.00503096	26.4	128	2.45957e-08
NC_027925.1	NC_027925.1 Apis mellifera filamentous virus isolate CH-CO5, partial genome	1	496396	2	65	0.0130944	0.000130944	26	255	2.45957e-08
NC_028657.1	NC_028657.1 Pseudomonas phage YMC11/02/R656, complete genome	1	60919	2	59	0.0968499	0.00192058	26.8	1	2.45957e-08
NC_028914.1	NC_028914.1 Mycobacterium phage Sheen, complete genome	1	52927	2	38	0.071797	0.00143594	24.9	255	2.45957e-08
NC_029899.1	NC_029899.1 Bat mastadenovirus WIV10, complete genome	1	37556	2	36	0.0958569	0.00181063	27	3	2.45957e-08
NC_030200.1	NC_030200.1 Macaca nemestrina herpesvirus 7, complete genome	1	137448	2	59	0.0429253	0.000829405	24.2	0	2.45957e-08
NC_030842.1	NC_030842.1 Ranavirus maximus isolate SMA15001, complete genome	1	115510	2	36	0.0311661	0.000614665	22.9	0	2.45957e-08
NC_030907.1	NC_030907.1 Gordonia phage GMA5, complete genome	1	17562	2	38	0.216376	0.00398588	23.8	255	2.45957e-08
NC_031016.1	NC_031016.1 Lactococcus phage PLgT-1, complete genome	1	40273	2	64	0.158915	0.00317831	26.6	255	2.45957e-08
NC_031927.1	NC_031927.1 Synechococcus phage S-CAM7 isolate 0910CC49, complete genome	1	216121	2	95	0.0439569	0.000439569	27.1	128	2.45957e-08
NC_033620.1	NC_033620.1 Murine roseolovirus isolate YOK1, complete genome	1	173861	2	91	0.0523407	0.000523407	27.4	129	2.45957e-08
NC_038332.1	NC_038332.1 Fowl adenovirus 6 strain CR119, complete genome	1	43810	2	91	0.207715	0.00207715	23	255	2.45957e-08
NC_038882.1	NC_038882.1 Hepatitis C virus (isolate H77) genotype 1, complete cds	1	9599	2	41	0.427128	0.00770914	19.7	255	2.45957e-08
NC_040309.1	NC_040309.1 Human DNA virus isolate IND-KIs-REVA-1990, complete genome	1	9585	2	36	0.375587	0.00709442	26.4	255	2.45957e-08
NC_041927.1	NC_041927.1 Sphingobium phage Lacusarx, complete genome	1	130138	2	118	0.090673	0.00090673	27.2	255	2.45957e-08
NC_041928.1	NC_041928.1 Staphylococcus phage phiIBB-SEP1, complete genome	1	139928	2	38	0.0271568	0.000543136	26.9	3	2.45957e-08
NC_042089.1	NC_042089.1 Gordonia phage Mahdia, complete genome	1	42475	2	41	0.0965274	0.00193055	25.7	255	2.45957e-08
NC_042095.1	NC_042095.1 Vibrio phage Thalassa, complete genome	1	128602	2	77	0.0598747	0.00116639	23.4	0	2.45957e-08
NC_042116.1	NC_042116.1 Yersinia phage fHe-Yen9-04 genome assembly, complete genome: monopartite	1	354378	2	87	0.0245501	0.000245501	24.9	255	2.45957e-08
NC_042337.1	NC_042337.1 Mycobacterium virus Astro, complete genome	1	52494	2	73	0.139064	0.00278127	26.1	255	2.45957e-08
NC_047815.1	NC_047815.1 Erwinia phage vB_EamM_Yoloswag, complete genome	1	259700	2	53	0.0204082	0.000408163	26.8	255	2.45957e-08
NC_047861.1	NC_047861.1 Bordetella phage vB_BbrM_PHB04, complete genome	1	94005	2	80	0.0851019	0.000851019	26	255	2.45957e-08
NC_047940.1	NC_047940.1 Yersinia phage YpsP-G, complete sequence	1	38288	2	42	0.109695	0.00201107	19.1	0	2.45957e-08
NC_048048.2	NC_048048.2 Caulobacter phage CcrSC, complete genome	1	317489	2	100	0.0314972	0.000314972	26.8	255	2.45957e-08
NC_048090.1	NC_048090.1 Microbacterium phage Armstrong, complete genome	1	39928	2	34	0.0851533	0.00170307	25.3	255	2.45957e-08
NC_048106.1	NC_048106.1 Synechococcus phage S-CBWM1, complete genome	1	139069	2	97	0.0697495	0.000697495	25.3	255	2.45957e-08
NC_048703.1	NC_048703.1 Xanthomonas phage RiverRider, complete genome	1	76335	2	40	0.0524006	0.000995611	26.6	255	2.45957e-08
NC_048742.1	NC_048742.1 Streptomyces phage Gilson, complete genome	1	128338	2	53	0.0412972	0.000709065	24	1	2.45957e-08
NC_048760.1	NC_048760.1 Salmonella phage Sepoy, complete genome	1	114080	2	41	0.0359397	0.000718794	25.1	255	2.45957e-08
NC_049919.1	NC_049919.1 Escherichia phage SH2026Stx1, complete genome	1	61564	2	61	0.0990839	0.00170554	25	0	2.45957e-08
NC_049941.1	NC_049941.1 Stx2-converting phage Stx2a_WGPS2 proviral DNA, complete genome	1	58326	2	200	0.3429	0.003429	25.8	255	2.45957e-08
NC_049945.1	NC_049945.1 Stx2-converting phage Stx2a_WGPS6 proviral DNA, complete genome	1	57849	2	53	0.0916178	0.00183236	26.1	3	2.45957e-08
NC_049946.1	NC_049946.1 Escherichia virus Lambda_4A7 genome assembly, chromosome: 1	1	49168	2	65	0.1322	0.002644	23.6	255	2.45957e-08
NC_049955.1	NC_049955.1 Escherichia phage Lambda_ev243 genome assembly, chromosome: 1	1	45560	2	182	0.399473	0.00399473	25.5	1.5	2.45957e-08
NC_051599.1	NC_051599.1 Mycobacterium phage Unicorn, complete genome	1	61208	2	39	0.0637172	0.00122533	27.1	255	2.45957e-08
NC_051625.1	NC_051625.1 Mycobacterium Phage Niklas, complete genome	1	60989	2	41	0.0672252	0.0013445	24.2	255	2.45957e-08
NC_054433.1	NC_054433.1 Mycobacterium phage Weirdo19, complete genome	1	52581	2	73	0.138833	0.00138833	22.2	255	2.45957e-08
NC_054662.1	NC_054662.1 Streptomyces phage Omar, complete genome	1	49299	2	37	0.0750522	0.00150104	24.8	255	2.45957e-08
NC_054727.1	NC_054727.1 Mycobacterium phage Phrappuccino, complete genome	1	136361	2	45	0.0330006	0.000660013	21.9	255	2.45957e-08
NC_055135.1	NC_055135.1 Retroperitoneal fibromatosis-associated herpesvirus isolate RFHVMnM78114, complete genome	1	127320	2	90	0.070688	0.00070688	24.7	255	2.45957e-08
NC_055139.1	NC_055139.1 Harp seal herpesvirus isolate FMV04-1493874, partial genome	1	117276	2	90	0.076742	0.00076742	25.2	255	2.45957e-08
NC_055228.1	NC_055228.1 Western grey kangaroopox virus strain Western Australia, complete genome	1	170141	2	41	0.0240977	0.000476076	25.5	129	2.45957e-08
NC_055365.1	NC_055365.1 Gordil virus isolate Dak ANBr 496d segment S, complete sequence	1	1949	2	44	2.25757	0.0354028	18.7	128	2.45957e-08
NC_055502.1	NC_055502.1 Spodoptera eridania nucleopolyhedrovirus isolate 251, complete genome	1	149090	2	40	0.0268294	0.000536589	26.9	3	2.45957e-08
NC_055554.1	NC_055554.1 Vombatid gammaherpesvirus 1 strain V3187/11, partial genome	1	109717	2	73	0.0665348	0.000665348	23.4	2	2.45957e-08
NC_055728.1	NC_055728.1 Serratia phage X20, complete genome	1	172450	2	70	0.0405915	0.00081183	23.7	3	2.45957e-08
NC_055770.1	NC_055770.1 Gordonia phage Buggaboo, complete genome	1	68626	2	33	0.0480867	0.000961735	26.2	0	2.45957e-08
NC_055910.1	NC_055910.1 Providencia phage PSTCR5, complete genome	1	109434	2	80	0.0731034	0.000731034	25.2	129	2.45957e-08
NC_055918.1	NC_055918.1 Mycobacterium phage OhShagHennessy, complete genome	1	72623	2	54	0.0743566	0.00141828	26.5	0	2.45957e-08
NC_061441.1	NC_061441.1 Erwinia phage pEa_SNUABM_16, complete genome	1	266838	2	99	0.0371012	0.000371012	25.3	255	2.45957e-08
NC_061447.1	NC_061447.1 Erwinia phage pEa_SNUABM_33, complete genome	1	263237	2	68	0.0258322	0.000258322	26.4	3	2.45957e-08
NC_062582.1	NC_062582.1 Pseudomonas phage Phabio, complete genome	1	309157	2	55	0.0177903	0.000355806	24.1	255	2.45957e-08
NC_070785.1	NC_070785.1 Streptomyces phage Wakanda, complete genome	1	126614	2	46	0.0363309	0.000671332	26.5	3	2.45957e-08
NC_070827.1	NC_070827.1 Pseudomonas phage Skulduggery, complete genome	1	62978	2	66	0.104799	0.00104799	26.2	255	2.45957e-08
NC_070852.1	NC_070852.1 Rhizobium phage RHph_I1_6, complete genome	1	77174	2	73	0.0945914	0.00168451	24.7	255	2.45957e-08
NC_070909.1	NC_070909.1 Escherichia phage Cartapus genome assembly, complete genome: monopartite	1	33368	2	117	0.350635	0.00701271	26.4	1	2.45957e-08
NC_070955.1	NC_070955.1 Burkholderia phage BgManors32, complete genome	1	59762	2	60	0.100398	0.00174024	23.6	129	2.45957e-08
NC_070962.1	NC_070962.1 Synechococcus phage S-SCSM1, complete genome	1	228827	2	73	0.0319018	0.000511303	23.8	255	2.45957e-08
NC_070966.1	NC_070966.1 Rhizobium phage RHph_TM30, complete genome	1	207623	2	50	0.0240821	0.000481642	27.3	3	2.45957e-08
NC_001900.2	NC_001900.2 Mycobacterium virus D29, complete genome	1	49127	3	32	0.0651373	0.00195412	25.2	1	3.68935e-08
NC_003038.1	NC_003038.1 Invertebrate iridescent virus 6, complete genome	1	212482	3	89	0.0418859	0.00056946	21.2	255	3.68935e-08
NC_003287.2	NC_003287.2 Enterobacteria phage M13, complete genome	1	6407	3	98	1.52958	0.027626	24	255	3.68935e-08
NC_003521.1	NC_003521.1 Panine herpesvirus 2 strain Heberling, complete genome	1	241087	3	106	0.0439675	0.000439675	23.6	171	3.68935e-08
NC_003836.1	NC_003836.1 Tomato aspermy virus RNA 3, complete sequence	1	2386	3	43	1.80218	0.0456832	26.1	171	3.68935e-08
NC_004914.3	NC_004914.3 Stx2 converting phage II DNA, complete genome	1	62706	3	147	0.234427	0.00360412	23.3	0	3.68935e-08
NC_005337.1	NC_005337.1 Bovine papular stomatitis virus, complete genome	1	134431	3	50	0.0371938	0.00110094	25.2	255	3.68935e-08
NC_007409.1	NC_007409.1 Acidianus two-tailed virus, complete genome	1	62730	3	34	0.0542005	0.00156225	23.7	255	3.68935e-08
NC_011038.1	NC_011038.1 Yersinia phage Yepe2, complete genome	1	38677	3	102	0.263723	0.00346459	25.1	87	3.68935e-08
NC_011588.1	NC_011588.1 Oryctes rhinoceros virus, complete genome	1	127615	3	31	0.0242918	0.000728754	27.9	255	3.68935e-08
NC_014229.1	NC_014229.1 Streptomyces phage phiSASD1, complete genome	1	37068	3	36	0.0971188	0.00291356	23.6	255	3.68935e-08
NC_016163.1	NC_016163.1 Yersinia phage phiR1-37, complete genome	1	262391	3	99	0.03773	0.000484011	26.6	171	3.68935e-08
NC_016765.1	NC_016765.1 Pseudomonas phage PMG1, complete genome	1	54024	3	55	0.101807	0.0028691	26.9	1	3.68935e-08
NC_018875.1	NC_018875.1 Epinotia aporema granulovirus, complete genome	1	119082	3	65	0.0545842	0.000764179	25.3	85.7	3.68935e-08
NC_019495.1	NC_019495.1 Cyprinid herpesvirus 2 strain ST-J1, complete genome	1	290304	3	107	0.0368579	0.000368579	24.4	255	3.68935e-08
NC_023423.1	NC_023423.1 Pithovirus sibericum isolate P1084-T, complete genome	1	610033	3	67	0.010983	0.000170483	23.3	255	3.68935e-08
NC_023677.1	NC_023677.1 Chimpanzee alpha-1 herpesvirus strain 105640, complete genome	1	153158	3	111	0.0724742	0.000724742	21.7	3	3.68935e-08
NC_023703.1	NC_023703.1 Mycobacterium phage Dori, complete genome	1	64613	3	32	0.0495256	0.00148577	24.3	85.7	3.68935e-08
NC_024709.1	NC_024709.1 Ball python nidovirus strain 07-53, complete genome	1	33452	3	62	0.18534	0.00343776	21.8	255	3.68935e-08
NC_026421.1	NC_026421.1 Equid herpesvirus 5 strain 2-141/67, complete genome	1	182380	3	108	0.059217	0.00059217	21.8	170	3.68935e-08
NC_028765.1	NC_028765.1 Staphylococcus phage phiIPLA-RODI, complete genome	1	142348	3	52	0.0365302	0.000793829	21.4	255	3.68935e-08
NC_030932.1	NC_030932.1 Gordonia phage Gsput1, complete genome	1	43505	3	29	0.066659	0.0019538	25.4	87	3.68935e-08
NC_031080.1	NC_031080.1 Mycobacterium phage Tonenili, complete genome	1	160985	3	39	0.0242259	0.000726776	26.9	255	3.68935e-08
NC_031099.1	NC_031099.1 Gordonia phage Hedwig, complete genome	1	44536	3	32	0.071852	0.00215556	18.7	255	3.68935e-08
NC_031906.1	NC_031906.1 Synechococcus phage S-CAM3 isolate 1010CC42, complete genome	1	198190	3	55	0.0277511	0.000832534	27.2	255	3.68935e-08
NC_032844.1	NC_032844.1 Wenling picorna-like virus 8 strain WLJQ103995 hypothetical protein gene, complete cds	1	9299	3	36	0.387138	0.0116142	22.3	255	3.68935e-08
NC_033774.1	NC_033774.1 Pepper chlorotic spot virus isolate 14YV733 segment L, complete sequence	1	8913	3	48	0.538539	0.0144732	23.2	255	3.68935e-08
NC_034446.1	NC_034446.1 Ateline alphaherpesvirus 1 isolate Lennette, complete genome	1	147346	3	120	0.081441	0.00081441	22.9	170	3.68935e-08
NC_037057.1	NC_037057.1 Dishui lake phycodnavirus 1, complete genome	1	181035	3	39	0.0215428	0.000646284	26.6	3	3.68935e-08
NC_042131.1	NC_042131.1 Pectobacterium phage vB_PatP_CB5, complete genome	1	44549	3	46	0.103257	0.00224472	25	2.33	3.68935e-08
NC_049951.1	NC_049951.1 Enterobacteria phage O276, complete genome	1	41969	3	139	0.331197	0.00497987	22.7	0	3.68935e-08
NC_053013.1	NC_053013.1 Pseudomonas phage vB_Pae-SS2019XI, complete genome	1	57567	3	35	0.0607987	0.00178922	27	255	3.68935e-08
NC_053511.1	NC_053511.1 Mycobacterium phage DyoEdafos, complete genome	1	77566	3	100	0.128922	0.00174045	24.8	171	3.68935e-08
NC_054148.1	NC_054148.1 Burkholderia phage Mica, complete genome	1	43707	3	60	0.137278	0.00411833	26.7	255	3.68935e-08
NC_055235.1	NC_055235.1 Baboon cytomegalovirus OCOM4-37, complete genome, *** SEQUENCING IN PROGRESS ***, 22 unordered pieces	1	170275	3	127	0.0745852	0.000745852	23.9	86	3.68935e-08
NC_055299.1	NC_055299.1 Alstroemeria necrotic streak virus isolate San_Vicente3 segment S, complete sequence	1	3113	3	64	2.05589	0.0420816	19.6	170	3.68935e-08
NC_055482.1	NC_055482.1 Pistachio ampelovirus A isolate W10, complete genome	1	17357	3	77	0.443625	0.00645273	22.5	171	3.68935e-08
NC_055891.1	NC_055891.1 CrAssphage cr60_1, complete genome	1	100198	3	57	0.0568874	0.00154694	24.9	255	3.68935e-08
NC_061443.1	NC_061443.1 Erwinia phage pEa_SNUABM_2, complete genome	1	265442	3	101	0.0380497	0.00057263	27.5	255	3.68935e-08
NC_063268.1	NC_063268.1 Bovine herpesvirus type 1.1 isolate NVSL challenge 97-11, complete genome	1	134896	3	91	0.0674594	0.000867335	24.7	170	3.68935e-08
NC_070849.1	NC_070849.1 Alcaligenes phage vB_AfaP_QDWS595, complete genome	1	70466	3	70	0.0993387	0.00143332	23.8	255	3.68935e-08
NC_071153.1	NC_071153.1 Klebsiella phage BUCT610, complete genome	1	46774	3	37	0.0791038	0.00237311	21.9	255	3.68935e-08
NC_001457.1	NC_001457.1 Human papillomavirus type 4, complete genome	1	7353	4	48	0.652795	0.0258398	26.2	255	4.91913e-08
NC_001866.1	NC_001866.1 Avian myelocytomatosis virus, complete genome	1	3392	4	220	6.48585	0.0919811	22.9	255	4.91913e-08
NC_003310.1	NC_003310.1 Monkeypox virus, complete genome	1	196858	4	34	0.0172713	0.000660374	20.9	255	4.91913e-08
NC_005260.1	NC_005260.1 Aeromonas phage Aeh1, complete genome	1	233234	4	81	0.0347291	0.000694581	24	255	4.91913e-08
NC_005946.1	NC_005946.1 Frog virus 3, complete genome	1	105903	4	93	0.0878162	0.00171855	24.3	65.5	4.91913e-08
NC_009760.1	NC_009760.1 Bacillus phage 0305phi8-36, complete genome	1	218948	4	68	0.0310576	0.000991103	26	255	4.91913e-08
NC_015253.1	NC_015253.1 Brochothrix phage A9, complete genome	1	127065	4	82	0.0645339	0.00121985	22.9	255	4.91913e-08
NC_018874.1	NC_018874.1 Abalone herpesvirus Victoria/AUS/2009, complete genome	1	211518	4	161	0.0761165	0.000761165	22.6	192	4.91913e-08
NC_019443.1	NC_019443.1 Synechococcus phage metaG-MbCM1, complete genome	1	172879	4	34	0.0196669	0.000786677	25.4	66	4.91913e-08
NC_019711.1	NC_019711.1 Enterobacteria phage HK629, complete genome	1	47288	4	62	0.131111	0.00467349	24.9	0	4.91913e-08
NC_020474.2	NC_020474.2 Elephantid herpesvirus 1, complete genome	1	180421	4	157	0.0870187	0.000870187	24.7	191	4.91913e-08
NC_023599.1	NC_023599.1 Bacillus phage phiCM3, complete genome	1	38772	4	39	0.100588	0.00340452	19.1	3	4.91913e-08
NC_023639.1	NC_023639.1 Mimivirus terra2 genome	1	1168989	4	157	0.0134304	0.000134304	23.6	192	4.91913e-08
NC_031235.1	NC_031235.1 Cyanophage S-RIM32 isolate RW_108_0702, complete genome	1	194437	4	112	0.0576022	0.000910321	25.5	191	4.91913e-08
NC_032001.1	NC_032001.1 Only Syngen Nebraska virus 5, complete genome	1	327147	4	82	0.0250652	0.00049519	21.6	255	4.91913e-08
NC_032111.1	NC_032111.1 BeAn 58058 virus, complete genome	1	163005	4	136	0.083433	0.00111653	25.8	255	4.91913e-08
NC_035117.1	NC_035117.1 Common bottlenose dolphin gammaherpesvirus 1 strain Sarasota, complete genome	1	167212	4	188	0.112432	0.00112432	20.7	128	4.91913e-08
NC_038668.1	NC_038668.1 harvey murine sarcoma virus p21 v-has protein gene	1	997	4	98	9.82949	0.199599	22.5	255	4.91913e-08
NC_041917.1	NC_041917.1 Serratia phage BF, complete genome	1	357154	4	145	0.0405987	0.000730777	26.6	255	4.91913e-08
NC_041994.1	NC_041994.1 Pseudomonas phage Noxifer, complete genome	1	278136	4	112	0.0402681	0.000693905	24.2	191	4.91913e-08
NC_043129.1	NC_043129.1 Micromonas pusilla virus SP1, complete genome, *** SEQUENCING IN PROGRESS ***, 2 unordered pieces	1	173451	4	73	0.0420868	0.000749491	22.9	255	4.91913e-08
NC_044949.1	NC_044949.1 African swine fever virus isolate Warthog, complete genome	1	186528	4	48	0.0257334	0.000895308	24.7	129	4.91913e-08
NC_048016.1	NC_048016.1 Erwinia phage Wellington, complete genome	1	244950	4	76	0.0310267	0.000979792	23.5	3	4.91913e-08
NC_048109.1	NC_048109.1 Pseudomonas phage Dobby, complete genome	1	37152	4	45	0.121124	0.0047373	26.8	255	4.91913e-08
NC_048163.1	NC_048163.1 Phage NC-A, complete genome	1	39536	4	35	0.0885269	0.00318697	26.3	0	4.91913e-08
NC_049344.1	NC_049344.1 Escherichia phage 520873, complete genome	1	37583	4	186	0.494905	0.00997792	23.3	255	4.91913e-08
NC_049947.1	NC_049947.1 Escherichia virus Lambda_1H12 genome assembly, chromosome: 1	1	46703	4	395	0.84577	0.0084577	24.4	64.8	4.91913e-08
NC_049953.1	NC_049953.1 Escherichia phage Lambda_ev099 genome assembly, chromosome: 1	1	47224	4	307	0.650093	0.00726326	24.2	128	4.91913e-08
NC_055166.1	NC_055166.1 Beluga whale alphaherpesvirus 1 strain LN3131-1, complete genome	1	144144	4	127	0.0881063	0.000881063	22	192	4.91913e-08
NC_055229.1	NC_055229.1 Eastern grey kangaroopox virus strain Sunshine Coast, complete genome	1	167359	4	42	0.0250958	0.000985905	26.2	63.8	4.91913e-08
NC_055526.1	NC_055526.1 Ovine adenovirus 8 strain 7508, complete genome	1	36206	4	132	0.36458	0.00397724	23.6	255	4.91913e-08
NC_070956.1	NC_070956.1 Aeromonas phage LAh10, complete genome	1	260310	4	77	0.0295801	0.0011832	26.6	255	4.91913e-08
NC_070960.1	NC_070960.1 Synechococcus phage S-H9-2, complete genome	1	187320	4	33	0.0176169	0.000704676	24.1	255	4.91913e-08
NC_001407.1	NC_001407.1 Rous sarcoma virus, complete genome	1	9392	5	167	1.77811	0.0414182	25.1	3	6.14892e-08
NC_002577.1	NC_002577.1 Gallid herpesvirus 3, complete genome	1	164270	5	110	0.0669629	0.00110793	26.9	2.2	6.14892e-08
NC_002794.1	NC_002794.1 Tupaiid herpesvirus 1, complete genome	1	195859	5	196	0.100072	0.00100072	25	205	6.14892e-08
NC_003620.1	NC_003620.1 Groundnut bud necrosis virus segment M, complete sequence	1	4801	5	46	0.958134	0.0433243	22.5	255	6.14892e-08
NC_008198.1	NC_008198.1 Mycobacterium phage PBI1, complete genome	1	64494	5	38	0.0589202	0.00294601	26.5	3	6.14892e-08
NC_008210.1	NC_008210.1 Ranid herpesvirus 2 strain ATCC VR-568, complete genome	1	231801	5	77	0.0332181	0.000910264	24.3	255	6.14892e-08
NC_008518.1	NC_008518.1 Trichoplusia ni ascovirus 2c, complete genome	1	174059	5	102	0.0586008	0.000988171	26.7	154	6.14892e-08
NC_014649.1	NC_014649.1 Acanthamoeba polyphaga mimivirus, complete genome	1	1181549	5	141	0.0119335	0.000214972	26.8	154	6.14892e-08
NC_014765.1	NC_014765.1 Bathycoccus sp. RCC1105 virus BpV1, complete genome	1	198519	5	147	0.0740483	0.00116865	23.2	154	6.14892e-08
NC_015569.1	NC_015569.1 Synechococcus phage S-CRM01, complete genome	1	178563	5	67	0.0375218	0.00150647	26.5	255	6.14892e-08
NC_016072.1	NC_016072.1 Megavirus chiliensis, complete genome	1	1259197	5	161	0.0127859	0.000155655	22.1	103	6.14892e-08
NC_016650.1	NC_016650.1 Rhodococcus phage RGL3, complete genome	1	48072	5	108	0.224663	0.00474289	27	255	6.14892e-08
NC_017972.1	NC_017972.1 Pseudomonas phage Lu11, complete genome	1	280538	5	93	0.0331506	0.000958872	24.5	154	6.14892e-08
NC_024450.1	NC_024450.1 Falconid herpesvirus 1 strain S-18, complete genome	1	204054	5	123	0.0602782	0.000901722	22.3	2.6	6.14892e-08
NC_031242.1	NC_031242.1 Cyanophage S-RIM50 isolate RW_29_0704, complete genome	1	174307	5	145	0.0831866	0.00200795	27.1	51.8	6.14892e-08
NC_038511.1	NC_038511.1 Tunisvirus fontaine2 strain U484, complete genome	1	380011	5	73	0.01921	0.000478934	25.9	255	6.14892e-08
NC_039089.1	NC_039089.1 Human papillomavirus type 71 DNA, complete genome	1	8017	5	72	0.898092	0.0265685	26.2	104	6.14892e-08
NC_040771.1	NC_040771.1 Tunis virus strain Brest/Ar/T2756 segment M, complete sequence	1	4806	5	48	0.998752	0.0314191	24.3	255	6.14892e-08
NC_042128.1	NC_042128.1 Escherichia phage RCS47, complete genome	1	115154	5	156	0.135471	0.0035865	26.7	52.6	6.14892e-08
NC_000852.5	NC_000852.5 Paramecium bursaria Chlorella virus 1, complete genome	1	330611	6	86	0.0260124	0.000946732	23	128	7.3787e-08
NC_001650.2	NC_001650.2 Equid herpesvirus 2 strain 86/67, complete genome	1	184439	6	242	0.131209	0.00131209	23.9	86	7.3787e-08
NC_002667.1	NC_002667.1 Lactococcus prophage bIL286, complete genome	1	41834	6	38	0.0908352	0.00437443	24.7	213	7.3787e-08
NC_004812.1	NC_004812.1 Macacine herpesvirus 1, complete genome	1	156789	6	158	0.100772	0.00144143	23.3	255	7.3787e-08
NC_007921.1	NC_007921.1 Agrotis segetum nucleopolyhedrovirus, complete genome	1	147544	6	165	0.111831	0.0017283	23.7	128	7.3787e-08
NC_012703.1	NC_012703.1 Nyamanini virus, complete genome	1	11631	6	53	0.455679	0.022698	24.8	255	7.3787e-08
NC_012783.2	NC_012783.2 Cercopithecine herpesvirus 5 strain 2715, complete genome	1	226205	6	128	0.0565858	0.000941624	26.8	128	7.3787e-08
NC_014567.1	NC_014567.1 Saimiriine herpesvirus 1, complete genome	1	156742	6	214	0.13653	0.0015567	24.3	86.7	7.3787e-08
NC_022642.1	NC_022642.1 Changuinola virus isolate CGLV/BE AN 28873 segment 9, complete sequence	1	910	6	38	4.17582	0.220879	22.7	255	7.3787e-08
NC_023006.1	NC_023006.1 Pseudomonas phage PPpW-3 DNA, complete sequence	1	43564	6	77	0.176751	0.0101689	26.6	255	7.3787e-08
NC_033003.1	NC_033003.1 Hubei picorna-like virus 61 strain mosHB235903 hypothetical protein gene, complete cds	1	8681	6	68	0.78332	0.030872	22.4	213	7.3787e-08
NC_033775.1	NC_033775.1 Noumeavirus isolate NMV1, complete genome	1	376207	6	99	0.0263153	0.000826673	25	255	7.3787e-08
NC_041878.1	NC_041878.1 Pectobacterium phage CBB, complete genome	1	378379	6	112	0.0296	0.000882713	25.8	44.3	7.3787e-08
NC_043176.1	NC_043176.1 Oxbow virus strain Ng1453 glycoprotein gene, complete cds	1	3643	6	41	1.12545	0.0581938	22	255	7.3787e-08
NC_052997.1	NC_052997.1 Salmonella phage ST-118, complete genome	1	59106	6	43	0.0727507	0.00326532	22	87	7.3787e-08
NC_061440.1	NC_061440.1 Erwinia phage pEa_SNUABM_22, complete genome	1	265146	6	103	0.0388465	0.00102585	25.2	171	7.3787e-08
NC_007809.1	NC_007809.1 Pseudomonas phage M6, complete genome	1	59446	7	85	0.142987	0.00529893	25.5	1.29	8.60848e-08
NC_013953.1	NC_013953.1 Lymantria xylina MNPV, complete genome	1	156344	7	51	0.0326204	0.00219388	23.8	3	8.60848e-08
NC_020104.1	NC_020104.1 Acanthamoeba polyphaga moumouvirus, complete genome	1	1021348	7	208	0.0203652	0.000270231	24.1	146	8.60848e-08
NC_021536.1	NC_021536.1 Synechococcus phage S-IOM18 genomic sequence	1	171797	7	73	0.042492	0.00253788	26.2	0	8.60848e-08
NC_022096.1	NC_022096.1 Pseudomonas phage PaBG, complete genome	1	258139	7	189	0.0732164	0.00134811	27	147	8.60848e-08
NC_022749.1	NC_022749.1 Shigella phage SfIV, complete genome	1	39758	7	254	0.638865	0.0148649	25.6	37.3	8.60848e-08
NC_028801.1	NC_028801.1 Mycobacterium phage Vortex, complete sequence	1	68346	7	35	0.05121	0.00327744	25.4	255	8.60848e-08
NC_047838.1	NC_047838.1 Synechococcus phage Bellamy, complete genome	1	204930	7	108	0.0527009	0.00212268	25.7	255	8.60848e-08
NC_001798.2	NC_001798.2 Human herpesvirus 2 strain HG52, complete genome	1	154675	8	235	0.151931	0.00204946	22.1	160	9.83827e-08
NC_002531.1	NC_002531.1 Alcelaphine herpesvirus 1, complete genome	1	130608	8	247	0.189116	0.00307791	24.1	128	9.83827e-08
NC_022563.1	NC_022563.1 Squirrel poxvirus strain Red squirrel UK complete genome	1	148803	8	111	0.0745953	0.00197577	26	255	9.83827e-08
NC_024474.1	NC_024474.1 Pigeon adenovirus 1 complete genome, strain IDA4	1	45480	8	233	0.512313	0.00710202	24	223	9.83827e-08
NC_036594.1	NC_036594.1 Orpheovirus IHUMI-LCC2 genome assembly, complete genome: monopartite	1	1473573	8	224	0.0152011	0.000219874	24.7	192	9.83827e-08
NC_040699.1	NC_040699.1 Drosophila innubila nudivirus isolate DiNV_CH01M, complete genome	1	155555	8	68	0.0437144	0.00190286	25.9	223	9.83827e-08
NC_049453.1	NC_049453.1 Klebsiella phage ST13-OXA48phi12.1, complete genome	1	39086	8	491	1.2562	0.0159648	26.4	34.5	9.83827e-08
NC_070951.1	NC_070951.1 Stenotrophomonas phage vB_SmaM_Ps15, complete genome	1	161350	8	103	0.0638364	0.00177874	27	223	9.83827e-08
NC_001266.1	NC_001266.1 Rabbit fibroma virus, complete genome	1	159857	9	46	0.0287757	0.00232082	25.5	143	1.10681e-07
NC_001403.1	NC_001403.1 Fujinami sarcoma virus, complete genome	1	4788	9	368	7.68588	0.159148	24.8	255	1.10681e-07
NC_006560.1	NC_006560.1 Cercopithecine herpesvirus 2, complete genome	1	150715	9	277	0.183791	0.00240852	23.6	143	1.10681e-07
NC_007653.1	NC_007653.1 Papiine herpesvirus 2, complete genome	1	156487	9	277	0.177012	0.00242832	23.1	143	1.10681e-07
NC_014637.1	NC_014637.1 Cafeteria roenbergensis virus BV-PW1, complete genome	1	617453	9	341	0.0552269	0.000618671	23.9	171	1.10681e-07
NC_042013.1	NC_042013.1 Agrobacterium phage Atu_ph07, complete genome	1	490380	9	121	0.0246747	0.000836086	25.5	255	1.10681e-07
NC_043325.1	NC_043325.1 Diolcogaster facetosa bracovirus segment 2, complete sequence	1	35842	9	179	0.499414	0.0122203	24.8	85.9	1.10681e-07
NC_048047.1	NC_048047.1 Caulobacter phage CcrBL9, complete genome	1	322272	9	157	0.0487166	0.00176869	25.8	227	1.10681e-07
NC_070961.1	NC_070961.1 Synechococcus phage S-H9-1, complete genome	1	192454	9	200	0.103921	0.00282665	26.4	171	1.10681e-07
NC_007346.1	NC_007346.1 Emiliania huxleyi virus 86, complete genome	1	407339	10	328	0.0805226	0.00101881	25.2	230	1.22978e-07
NC_011345.1	NC_011345.1 Agrotis ipsilon multiple nucleopolyhedrovirus, complete genome	1	155122	10	127	0.081871	0.00223695	25	204	1.22978e-07
NC_021221.1	NC_021221.1 Fowl adenovirus 5 strain 340, complete genome	1	45781	10	42	0.0917411	0.00854066	24.7	230	1.22978e-07
NC_028091.1	NC_028091.1 Ostreococcus lucimarinus virus 2 isolate Olv2, complete genome	1	196300	10	59	0.030056	0.00250637	26.3	1.4	1.22978e-07
NC_029255.1	NC_029255.1 Myotis gammaherpesvirus 8 strain My-HV8/Myotis velifer incautus/USA/FCGHV/2011, partial genome	1	129563	10	187	0.144331	0.00373563	24.8	179	1.22978e-07
NC_029302.1	NC_029302.1 Piscine myocarditis-like virus isolate Golden shiner/PMCLV/USA/MN/2014, complete genome	1	6038	10	48	0.794965	0.0741968	20.5	255	1.22978e-07
NC_049451.1	NC_049451.1 Klebsiella phage ST147-VIM1phi7.1, complete genome	1	34141	10	474	1.38836	0.0299347	25	53.4	1.22978e-07
NC_055732.1	NC_055732.1 Gordonia phage Patio, complete genome	1	66251	10	31	0.0467917	0.00467917	22.2	1	1.22978e-07
NC_006641.1	NC_006641.1 Cotesia congregata virus complete genome, segment Circle9	1	15959	11	102	0.639138	0.044113	26.2	163	1.35276e-07
NC_010276.1	NC_010276.1 Orgyia leucostigma NPV, complete genome	1	156179	11	65	0.0416189	0.0039506	25.8	232	1.35276e-07
NC_015279.1	NC_015279.1 Synechococcus phage S-SM2, complete genome	1	190789	11	73	0.0382622	0.00406732	26.5	93.4	1.35276e-07
NC_019929.1	NC_019929.1 Erwinia phage phiEaH2, complete genome	1	243050	11	88	0.0362065	0.002374	25.2	255	1.35276e-07
NC_023719.1	NC_023719.1 Bacillus phage G, complete genome	1	497513	11	130	0.02613	0.00153564	26.4	232	1.35276e-07
NC_028461.1	NC_028461.1 Epizootic haematopoietic necrosis virus, complete genome	1	127011	11	59	0.0464527	0.00396816	24.7	0.545	1.35276e-07
NC_030936.1	NC_030936.1 Gordonia phage Bachita, complete genome	1	93843	11	68	0.0724615	0.00797076	26.2	0.0909	1.35276e-07
NC_043530.1	NC_043530.1 Mythimna unipuncta nucleopolyhedrovirus strain #7, complete genome	1	148482	11	70	0.0471438	0.0027276	22.2	255	1.35276e-07
NC_071006.1	NC_071006.1 Gordonia phage ChisanaKitsune, complete genome	1	88657	11	37	0.0417339	0.00446665	26	255	1.35276e-07
NC_008094.1	NC_008094.1 Y73 sarcoma virus, complete genome	1	5188	12	442	8.51966	0.190054	24.9	150	1.47574e-07
NC_009127.1	NC_009127.1 Cyprinid herpesvirus 3, complete genome	1	295146	12	415	0.140608	0.00231072	24.3	149	1.47574e-07
NC_030230.1	NC_030230.1 Tokyovirus A1 DNA, nearly complete genome	1	372707	12	260	0.0697599	0.00144886	25.4	171	1.47574e-07
NC_048046.1	NC_048046.1 Caulobacter phage CcrPW, complete genome	1	308141	12	148	0.04803	0.00171999	25.6	192	1.47574e-07
NC_048077.1	NC_048077.1 Dickeya phage vB_DsoM_JA11, complete genome	1	255356	12	127	0.0497345	0.00203246	25.7	234	1.47574e-07
NC_002687.1	NC_002687.1 Ectocarpus siliculosus virus 1, complete genome	1	335593	13	312	0.0929698	0.00137965	25.5	158	1.59872e-07
NC_003315.1	NC_003315.1 Haemophilus phage HP2, complete genome	1	31508	13	76	0.241209	0.025073	25.9	3	1.59872e-07
NC_028094.1	NC_028094.1 Chrysochromulina ericina virus isolate CeV-01B, complete genome	1	473558	13	311	0.0656731	0.00099671	23.8	138	1.59872e-07
NC_028379.1	NC_028379.1 Elephant endotheliotropic herpesvirus 4 isolate North American NAP69, complete genome	1	205896	13	285	0.138419	0.00235556	25.3	216	1.59872e-07
NC_001604.1	NC_001604.1 Enterobacteria phage T7, complete genome	1	39937	14	537	1.34462	0.0240128	25.7	129	1.7217e-07
NC_004688.1	NC_004688.1 Mycobacterium phage Omega, complete genome	1	110865	14	76	0.0685518	0.00468137	25.3	21	1.7217e-07
NC_008913.1	NC_008913.1 Glypta fumiferanae ichnovirus segment C10, complete sequence	1	3157	14	119	3.7694	0.198606	25.9	38.2	1.7217e-07
NC_009333.1	NC_009333.1 Human herpesvirus 8 strain GK18, complete genome	1	137969	14	109	0.0790033	0.00495764	26.4	237	1.7217e-07
NC_043054.1	NC_043054.1 Bubaline alphaherpesvirus 1 strain b6, complete genome	1	137452	14	372	0.27064	0.00362308	21.7	146	1.7217e-07
NC_038858.1	NC_038858.1 FBR murine osteosarcoma, complete proviral sequence integrated in Rattus norvegicus genome	1	3811	15	83	2.17791	0.240357	26.3	3	1.84468e-07
NC_009424.5	NC_009424.5 Woolly monkey sarcoma virus	1	5779	16	64	1.10746	0.145354	25.8	208	1.96765e-07
NC_071005.1	NC_071005.1 Gordonia phage Chidiebere, complete genome	1	91072	16	33	0.0362351	0.00569879	26.3	255	1.96765e-07
NC_001973.1	NC_001973.1 Lymantria dispar MNPV, complete genome	1	161046	17	63	0.0391193	0.00545186	26.6	255	2.09063e-07
NC_002169.1	NC_002169.1 Spodoptera exigua nucleopolyhedrovirus complete genome	1	135611	17	36	0.0265465	0.00450553	24.1	0.235	2.09063e-07
NC_004065.1	NC_004065.1 Murid herpesvirus 1, complete genome	1	230278	17	254	0.110301	0.00299204	24.7	240	2.09063e-07
NC_020864.1	NC_020864.1 Micromonas pusilla virus 12T genomic sequence	1	205622	17	129	0.0627365	0.00624933	26.8	255	2.09063e-07
NC_050154.1	NC_050154.1 Escherichia phage D6, complete genome	1	91159	17	791	0.867715	0.0183087	26.1	240	2.09063e-07
NC_001731.1	NC_001731.1 Molluscum contagiosum virus subtype 1, complete genome	1	190289	18	323	0.169742	0.0037154	25.7	43.6	2.21361e-07
NC_005261.3	NC_005261.3 Bovine herpesvirus 5 strain SV507/99, complete genome	1	138390	18	263	0.190043	0.00446564	23.7	115	2.21361e-07
NC_006273.2	NC_006273.2 Human herpesvirus 5 strain Merlin, complete genome	1	235646	18	159	0.0674741	0.00292388	25.3	255	2.21361e-07
NC_015286.1	NC_015286.1 Synechococcus phage Syn19, complete genome	1	175230	18	74	0.0422302	0.00743594	26	227	2.21361e-07
NC_055561.1	NC_055561.1 Cervid alphaherpesvirus 3 strain Canada, partial genome	1	136380	18	501	0.367356	0.00536736	23.5	143	2.21361e-07
NC_047818.1	NC_047818.1 Klebsiella phage 4 LV-2017, complete genome	1	33540	19	284	0.84675	0.0329159	24.8	228	2.33659e-07
NC_055555.1	NC_055555.1 Phascolarctid gammaherpesvirus 1 strain 36M/11, partial genome	1	116729	20	69	0.0591113	0.00801001	25.5	179	2.45957e-07
NC_049942.1	NC_049942.1 Escherichia phage JLK-2012, complete sequence	1	57198	21	128	0.223784	0.0273261	24.8	255	2.58255e-07
NC_070957.1	NC_070957.1 Aeromonas phage D3, complete genome	1	262372	21	76	0.0289665	0.00531307	25.9	1	2.58255e-07
NC_013668.3	NC_013668.3 Anguillid herpesvirus 1, complete genome	1	248526	22	296	0.119102	0.00354892	24.7	209	2.70552e-07
NC_033780.2	NC_033780.2 Mythimna unipuncta granulovirus B isolate MyunGV#8, complete genome	1	144673	22	276	0.190775	0.00611033	23.7	198	2.70552e-07
NC_000898.1	NC_000898.1 Human herpesvirus 6B, complete genome	1	162114	23	118	0.0727883	0.00669282	26.6	2.91	2.8285e-07
NC_001493.2	NC_001493.2 Ictalurid herpesvirus 1 strain Auburn 1, complete genome	1	134226	23	207	0.154218	0.00862724	26.7	13.8	2.8285e-07
NC_020231.1	NC_020231.1 Caviid herpesvirus 2 strain 21222, complete genome	1	233501	24	357	0.15289	0.00453103	24	54.8	2.95148e-07
NC_034266.1	NC_034266.1 Columbid alphaherpesvirus 1 strain HLJ, complete genome	1	204237	24	255	0.124855	0.00477387	23.7	2	2.95148e-07
NC_038553.1	NC_038553.1 Heterosigma akashiwo virus 01 isolate HaV53, complete genome	1	274793	24	153	0.0556783	0.0044761	22.6	150	2.95148e-07
NC_071015.1	NC_071015.1 Kosakonia phage Kc263, complete genome	1	253740	24	114	0.0449279	0.00680618	26.8	244	2.95148e-07
NC_002512.2	NC_002512.2 Rat cytomegalovirus Maastricht, complete genome	1	230138	25	164	0.0712616	0.00411492	25.2	235	3.07446e-07
NC_070765.1	NC_070765.1 Mycobacterium phage Onyinye, complete genome	1	71419	25	65	0.0910122	0.0160462	26.4	21.2	3.07446e-07
NC_037667.1	NC_037667.1 Pandoravirus quercus, complete genome	1	2077288	26	771	0.0371157	0.000524723	24.4	168	3.19744e-07
NC_061451.1	NC_061451.1 Erwinia phage pEa_SNUABM_7, complete genome	1	265635	26	219	0.082444	0.00444219	25.5	206	3.19744e-07
NC_050152.1	NC_050152.1 Enterobacteria phage P7, complete genome	1	101660	27	867	0.852843	0.0274444	24.9	255	3.32042e-07
NC_024303.1	NC_024303.1 Bovine herpesvirus 6 isolate Pennsylvania 47, complete genome	1	144898	28	232	0.160113	0.0110008	25.2	165	3.44339e-07
NC_070898.1	NC_070898.1 Streptococcus phage SW22, complete genome	1	31738	28	52	0.163841	0.0379356	25.9	219	3.44339e-07
NC_055230.1	NC_055230.1 Akhmeta virus isolate Akhmeta_2013-88, complete genome	1	221923	29	211	0.095078	0.00611473	25.5	124	3.56637e-07
NC_048804.1	NC_048804.1 Stenotrophomonas phage Mendera, complete genome	1	159961	31	164	0.102525	0.0128906	26.4	190	3.81233e-07
NC_071036.1	NC_071036.1 Stenotrophomonas phage vB_SmaS-AXL_3, complete genome	1	47545	31	95	0.199811	0.0341992	25.4	189	3.81233e-07
NC_028099.1	NC_028099.1 Felis catus gammaherpesvirus 1 isolate 31286, complete genome	1	122522	32	108	0.0881474	0.0118591	24.4	128	3.93531e-07
NC_040539.1	NC_040539.1 Rhinolophus gammaherpesvirus 1 BV1 DNA, complete genome	1	147790	34	100	0.0676636	0.0126125	25.5	158	4.18126e-07
NC_008912.1	NC_008912.1 Glypta fumiferanae ichnovirus segment C9, complete sequence	1	3141	35	245	7.80006	0.58007	26	111	4.30424e-07
NC_029692.1	NC_029692.1 Brazilian marseillevirus strain BH2014, complete genome	1	362276	35	151	0.0416809	0.00572216	25.9	190	4.30424e-07
NC_040625.1	NC_040625.1 Rhynchobatus djiddensis adomavirus 1 isolate UGA1, complete genome	1	21527	36	151	0.701445	0.0746504	23.9	185	4.42722e-07
NC_047887.1	NC_047887.1 Pectobacterium phage DU_PP_V, complete genome	1	106185	36	32	0.0301361	0.010849	25.6	255	4.42722e-07
NC_001506.1	NC_001506.1 Murine osteosarcoma virus, complete genome	1	3811	39	142	3.72606	0.564681	25.1	3	4.79616e-07
NC_037666.1	NC_037666.1 Pandoravirus neocaledonia, complete genome	1	2003191	40	1131	0.0564599	0.000791737	23.7	211	4.91913e-07
NC_040536.1	NC_040536.1 Esparto virus isolate SRR3939042_Esparto_2012, complete genome	1	183261	41	344	0.18771	0.00994756	24	162	5.04211e-07
NC_044937.1	NC_044937.1 Paramecium bursaria Chlorella virus CVA-1, partial genome	1	326592	52	375	0.114822	0.00861626	26.4	74.9	6.39487e-07
NC_002641.1	NC_002641.1 Meleagrid herpesvirus 1, complete genome	1	159160	55	104	0.0653431	0.0163169	25.7	3	6.76381e-07
NC_008962.1	NC_008962.1 Hyposoter fugitivus ichnovirus segment B5, complete sequence	1	3385	55	93	2.74742	0.794978	23.9	232	6.76381e-07
NC_049343.1	NC_049343.1 Escherichia phage 500465-2, complete genome	1	33041	57	1676	5.07249	0.135529	25.4	255	7.00977e-07
NC_005885.1	NC_005885.1 Actinoplanes phage phiAsp2, complete genome	1	58638	58	86	0.146663	0.0365804	25.6	251	7.13274e-07
NC_006151.1	NC_006151.1 Suid herpesvirus 1, complete genome	1	143461	58	500	0.348527	0.0148333	24.2	203	7.13274e-07
NC_027867.1	NC_027867.1 Mollivirus sibericum isolate P1084-T, complete genome	1	651523	59	1197	0.183723	0.00353786	24.2	169	7.25572e-07
NC_070760.1	NC_070760.1 Arthrobacter phage Wollypog, complete genome	1	63364	65	51	0.0804873	0.039281	25.7	255	7.99359e-07
NC_019491.1	NC_019491.1 Cyprinid herpesvirus 1 strain NG-J1, complete genome	1	291144	68	682	0.234248	0.0102733	24.5	181	8.36253e-07
NC_024382.1	NC_024382.1 Alcelaphine herpesvirus 2 isolate topi-AlHV-2, complete genome	1	137090	71	341	0.248742	0.0249909	25.4	101	8.73146e-07
NC_009898.1	NC_009898.1 Paramecium bursaria Chlorella virus NY2A, complete genome	1	368683	74	174	0.047195	0.00912166	23.8	252	9.1004e-07
NC_021858.1	NC_021858.1 Pandoravirus dulcis, complete genome	1	1908524	75	1820	0.0953617	0.00153731	23.5	231	9.22338e-07
NC_007646.1	NC_007646.1 Ovine herpesvirus 2 strain BJ1035, complete genome	1	135135	77	203	0.15022	0.0262626	25.6	166	9.46933e-07
NC_024697.1	NC_024697.1 Aureococcus anophagefferens virus isolate BtV-01, complete genome	1	370920	83	565	0.152324	0.0137119	26.6	188	1.02072e-06
NC_026440.1	NC_026440.1 Pandoravirus inopinatum isolate KlaHel, complete genome	1	2243109	84	1772	0.0789975	0.00148856	23.2	183	1.03302e-06
NC_053004.1	NC_053004.1 Salmonella phage TS13, complete genome	1	59168	85	66	0.111547	0.0925162	26.3	255	1.04532e-06
NC_001987.1	NC_001987.1 Ateline herpesvirus 3 complete genome	1	108409	93	460	0.424319	0.043216	24.7	149	1.1437e-06
NC_011290.1	NC_011290.1 Mycobacterium phage Gumball, complete genome	1	64807	97	70	0.108013	0.0778928	26.2	184	1.19289e-06
NC_055911.1	NC_055911.1 Burkholderia phage phiE094, complete genome	1	37727	101	57	0.151085	0.0876561	22.4	150	1.24208e-06
NC_022098.1	NC_022098.1 Pandoravirus salinus, complete genome	1	2473870	104	2122	0.0857765	0.00167511	24.2	187	1.27897e-06
NC_021312.1	NC_021312.1 Phaeocystis globosa virus strain 16T, complete genome	1	459984	106	476	0.103482	0.0115243	25.2	167	1.30357e-06
NC_037665.1	NC_037665.1 Pandoravirus macleodensis, complete genome	1	1838258	116	2465	0.134094	0.00255078	23.5	179	1.42655e-06
NC_049454.1	NC_049454.1 Klebsiella phage ST15-OXA48phi14.1, complete genome	1	33839	150	363	1.07273	0.3566	24.7	1.03	1.84468e-06
NC_024625.1	NC_024625.1 Peridroma alphabaculovirus isolate GR_167, complete genome	1	151109	166	113	0.0747805	0.0521412	25.1	255	2.04144e-06
NC_003225.3	NC_003225.3 White spot syndrome virus strain CN01, complete genome	1	309286	169	828	0.267713	0.0248993	25.7	242	2.07833e-06
NC_047942.1	NC_047942.1 Escherichia phage Ebrios, complete genome	1	39752	183	98	0.246528	0.292136	26	0.667	2.2505e-06
NC_049342.1	NC_049342.1 Escherichia phage 500465-1, complete genome	1	39179	235	1719	4.38755	0.63021	25.7	241	2.88999e-06
NC_055368.1	NC_055368.1 Rukutama virus strain LEIV-6269C segment L, complete sequence	1	6457	288	39	0.603996	1.66378	24.6	255	3.54178e-06
NC_055467.1	NC_055467.1 Cyclophragma undans nucleopolyhedrovirus isolate Whiov, complete genome	1	142900	373	180	0.125962	0.0926382	24.9	252	4.58709e-06
NC_042057.1	NC_042057.1 Enterobacteria phage DE3, complete genome	1	42925	606	2443	5.69132	1.25037	25.2	251	7.45249e-06
NC_018464.1	NC_018464.1 Shamonda virus N and NSs genes, segment S, genomic RNA, isolate Ib An 5550	1	927	29354	69	7.44337	1521.88	25.8	255	0.000360991
NC_008168.1	NC_008168.1 Choristoneura fumiferana granulovirus, complete genome	1	104710	81445	183	0.174768	42.6359	25.7	255	0.0010016
